# Supplementary material
Source: PubMed Central journal article supplement (PMC7313529)
Supplement: bjophthalmol-2020-316776s002.pdf [file bjophthalmol-2020-316776s002.pdf]

| <b>First Name</b> | <b>Last Name</b>  | <b>Affiliation</b>                                                                                           | <b>Country</b> |
|-------------------|-------------------|--------------------------------------------------------------------------------------------------------------|----------------|
| Amer              | Awan              | Shifa International Hospital Islamabad<br>Pakistan                                                           | Pakistan       |
| MONICA            | SIGNORELLI        | CENTRO CAMPINEIRO DE<br>MICROCIRURGIA / UNICAMP                                                              | Brasil         |
| Karen             | Armbrust          | VAMC Minneapolis and University of<br>Minnesota                                                              | USA            |
| Stephen           | Anesi             | Massachusetts Eye Research & Surgery<br>Institution                                                          | USA            |
| J Jacobo          | González-Guijarro | Hospital Universitario de la Princesa                                                                        | Spain          |
| PINAR             | OZDAL             | UNIVERSITY OF HEALTH SCIENCES,<br>ULUCANLAR EYE EDUCATION AND<br>RESEARCH HOSPITAL                           | TURKEY         |
| Alessandro        | Invernizzi        | Luigi Sacco Hospital - University of Milan                                                                   | Italy          |
| Nitin             | Kumar             | PGIMER, Chandigarh                                                                                           | India          |
| Romi              | Chhabra           | Manchester Royal Eye Hospital                                                                                | United Kingdom |
| Yew Sen           | Yuen              | National University Hospital, Singapore                                                                      | Singapore      |
| Hashem            | Ghoraba           | Magrabi Eye Hospital                                                                                         | Egypt          |
| MARGARITA         | JÓDAR-MÁRQUEZ     | HOSPITAL REGIONAL DE MÁLAGA                                                                                  | España         |
| Gonzalo           | Duarte            | Hospital Carlos Van Buren / Instituto de<br>Salud Visual ISV                                                 | Chile          |
| Fehim             | Esen              | Istanbul Medeniyet University Faculty of<br>Medicine                                                         | Turkey         |
| Laura             | Ross              | Royal Victorian Eye and Ear Hospital                                                                         | Australia      |
| Murat             | Hasanreisoglu     | Gazi University, School of Medicine                                                                          | Türkiye        |
| Rina              | La Distia Nora    | Faculty of Medicine Universitas<br>Indonesia, Cipto Mangunkusumo<br>Hospital, Universitas Indonesia Hospital | Indonesia      |
| Laura             | Kopplin           | University of Wisconsin-Madison                                                                              | USA            |

|              |                |                                                                                                       |               |
|--------------|----------------|-------------------------------------------------------------------------------------------------------|---------------|
| Marie Helene | Errera         | UPMC Eye Center Pittsburgh,<br>Pennsylvania, USA                                                      | USA           |
| Jung Hyun    | Park           | Inje University, Seoul Paik Hospital,<br>Seoul, Korea                                                 | Korea         |
| Guoping      | Kuang          | the department of ophthalmology                                                                       | China         |
| Mohammad     | Sadiq          | Department of Ophthalmology and<br>Visual Sciences, University of Louisville,<br>Louisville, Kentucky | United States |
| Sophaktra    | Chea           | Khmer-Soviet Friendship Hospital                                                                      | Cambodia      |
| albert       | vitale         | University Utah                                                                                       | United States |
| Victor       | Perez          | Duke University                                                                                       | USA           |
| ANA          | BLANCO ESTEBAN | HOSPITAL UNIVERSITARIO DONOSTIA                                                                       | SPAIN         |
| Wataru       | Matsumiya      | Spencer Center for Vision Research, Byers<br>Eye Institute at Stanford University                     | US            |
| Samendra     | Karkhur        | All India Institute of Medical Sciences,<br>Bhopal                                                    | India         |
| Ninani       | Kombo          | Yale University                                                                                       | USA           |
| QUAN DONG    | NGUYEN         | Byers Eye Institute, Stanford University                                                              | United States |
| Maria        | Jancevski      | Oakland Ophthalmic Surgery                                                                            | United States |
| Anthony      | Smith          | Flinders Medical Centre                                                                               | 50            |
| S            | Sudharshan     | Sankara Nethralaya, India                                                                             | India         |
| Ekaterina    | Denisova       | Helmholtz Moscow Research Institute of<br>Eye Diseases                                                | Russia        |
| Heinz        | Carsten        | Department of Ophthalmology at St.<br>Franziskus Hospital                                             | Germany       |
| Koh-Hei      | Sonoda         | Kyushu University                                                                                     | Japan         |
| Sofia        | Tognon         | Azienda ospedaliera padova                                                                            | Italy         |
| Yan          | Guex-Crosier   | Jules-Gonin Eye Hospital, FAA, University<br>of Lausanne                                              | Switzerland   |
| Moncef       | Khairallah     | Fattouma Bourguiba University Hospital,<br>Faculty of Medicine, University of<br>Monastir             | Tunisia       |

|                     |                            |                                                                                     |                                |
|---------------------|----------------------------|-------------------------------------------------------------------------------------|--------------------------------|
| Alan Sarkis         | Palestine Soukiasian       | Colorado Lahey Hospital and medical center                                          | USA usa                        |
| Sana                | Khochtali                  | Fattouma Bourguiba University Hospital, Faculty of Medicine, University of Monastir | Tunisia                        |
| Ratna               | Sitompul                   | Cipto Mangunkusumo Teaching Hospital                                                | Indonesia                      |
| Nazanin Piergiorgio | Ebrahimiadib Neri          | Tehran University of Medical Sciences Cleveland Clinic Abu Dhabi                    | Iran UAE                       |
| Alexandra ROSARIO   | Kozyreff UCEDA TORRES      | Cliniques universitaires St-Luc UCL Servicio Andaluz de Salud                       | Belgium Spain                  |
| John JOSE           | Huang BENITEZ-DEL-CASTILLO | New England Retina Associates HOSPITAL CLINICO SAN CARLOS                           | United States SPAIN            |
| Nilüfer             | Yalçındağ                  | Ankara University Faculty of Medicine Department of Ophthalmology                   | Turkey                         |
| Merih               | Oray                       | Istanbul University Faculty of Medicine                                             | Turkey                         |
| Mayur               | Moreker                    | Bombay Hospital Institute of Medical Sciences, Mumbai                               | India                          |
| Salil Sentaro       | Mehta Kusuhara             | Lilavati hospital Kobe University Hospital                                          | India Japan                    |
| Yung Jen            | Lai                        | MacKay Memorial Hospital                                                            | Taiwan                         |
| Rehab Shawkat       | Helal Michel               | Hamad medical corporation My clinic                                                 | Qatar Canada                   |
| Avinash Tim         | Gurbaxani Greenwell        | Moorfields Eye Hospital Dubai Flinders Medical Centre                               | United Arab Emirates Australia |
| Justine             | Smith                      | Flinders Medical Centre (clinical), Flinders University (academic)                  | Australia                      |
| Christine Islam     | Younan Shah mohammad       | University of Sydney Ibn sina medical college,                                      | Australia Bangladesh.          |
| Samantha Denis      | Fraser-Bell wakefiled      | Royal North Shore Hospital St Vincents Hospital                                     | Australia Australia            |
| Nobuyo              | Yawata                     | Kyushu University                                                                   | 日本                             |

|             |                     |                                                                                         |                |
|-------------|---------------------|-----------------------------------------------------------------------------------------|----------------|
| Ariel       | Schlaen             | Hospital Universitario Austral                                                          | Argentina      |
| S.Maryam    | Hosseini            | Mashhad university of medical sciences                                                  | Iran           |
| James       | Folk                | Univ of Iowa Hospitals and Clinics                                                      | USA            |
| Daniel      | Johnson             | UT Health San Antonio                                                                   | United States  |
| David       | Hinkle              | WVU                                                                                     | US             |
| Joyce Hisae | Yamamoto            | Uveitis Service University of Sao Paulo,<br>School of Medicine, Sao Paulo, SP, Brazil   | Brazil         |
| Oleksandra  | Zborovska           | Filatov's Institute of Eye Disease and<br>Tissue Therapy NAMS                           | Ukraine        |
| Rene A.     | Cervantes-Castañeda | Laser Vision by Grupo Oftalmologico                                                     | Mexico         |
| Radgonde    | Amer                | Hadassah Medical Center, Jerusalem                                                      | Israel         |
| Meghan      | Berkenstock         | Wilmer Eye Institute                                                                    | USA            |
| James       | Dunn                | Wills Eye Hospital                                                                      | USA            |
| SR          | Rathinam            | Aravind eye hospital                                                                    | India          |
| Marilita M  | Moschos             | Department of Ophthalmology,<br>University of Athens                                    | Greece         |
| Samir       | Shoughy             | The Eye Center                                                                          | Saudi Arabia   |
| Marion      | Funk                | Medical University of Vienna                                                            | Austria        |
| Hiroshi     | Takase              | Department of Ophthalmology & Visual<br>Science, Tokyo Medical and Dental<br>University | Japan          |
| Sudha       | Ganesh              | Medical Research Foundation                                                             | India          |
| Jennifer    | Thorne              | Wilmer Eye Institute, Johns Hopkins<br>University School of Medicine                    | USA            |
| Oleksandra  | Dorokhova           | SI 'Filatov Institute of eye diseases and<br>tissue therapy NAMS'                       | Ukraine        |
| Carlos      | Pavesio             | Moorfields                                                                              | United Kingdom |
| Yael        | Sharon              | Rabin Medical Center, Israel                                                            | Israel         |
| Jean        | Deschênes           | McGill University, McGill University<br>Health Center                                   | Canada         |
| Rola        | Hamam               | American university of beirut                                                           | Lebanon        |

|            |               |                                                                      |                   |
|------------|---------------|----------------------------------------------------------------------|-------------------|
| Nicholas   | Jones         | Manchester Uveitis Clinic, Manchester Royal Eye Hospital, UK         | United Kingdom    |
| Makhoul    | Dorine        | CHU Saint Pierre                                                     | Belgium           |
| Edoardo    | BAGLIVO       | Clinique de l'Oeil                                                   | switzerland       |
| Maria Pia  | Paroli        | Università la "Sapienza" Policlinico Umberto I                       | Italy             |
| Vita       | Dingerkus     | City hospital Triemli, Zurich                                        | Switzerland       |
| Luca       | De Simone     | Arcispedale Santa Maria Nuova AUSL-IRCCS Reggio Emilia               | Italy             |
| Justus     | Garweg        | Berner Augenklinik am Lindenhofspital                                | Schweiz           |
| Jenny      | Laithwaite    | Private practice                                                     | South Africa      |
| Joke       | de Boer       | University Medical Center Utrecht                                    | Netherlands       |
| JYOTIRMAY  | BISWAS        | Sankara Nethralaya                                                   | India             |
| Ankush     | Kawali        | Narayana Nethralaya                                                  | India             |
| Lynn       | Hassman       | Washington university in St Louis                                    | United States     |
| Dipankar   | Das           | Sri Sankaradeva Nethralaya, Guwahati, INDIA                          | India             |
| Annabelle  | Okada         | Kyorin University School of Medicine                                 | Japan             |
| Ying       | Qian          | Kaiser Permanente North California                                   | Usa               |
| Boonsiri   | Hunchangsith  | Banphaeo Hospital                                                    | Thailand          |
| ayaka      | miyai         | sannoudai hospital                                                   | Japan             |
| Hyeong Gon | Yu            | Seoul National University Hospital                                   | South Korea       |
| Manabu     | Mochizuki     | Miyata Eye Hospital                                                  | Japan             |
| Jeong Hun  | Bae           | Kangbuk Samsung Hospital, Sungkyunkwan University School of Medicine | Republic of Korea |
| Anthony    | Hall          | Private Practice and public hospital                                 | Australia         |
| Nor Fariza | Ngah          | Hospital Shah Alam                                                   | Malaysia          |
| kessara    | pathanapitoon | chiang mai university                                                | thailand          |
| John       | Gonzales      | University of California, San Francisco                              | USA               |
| Dr Samyak  | Mulkutkar     | P D Hinduja Hospital and Medical Research Centre, Mahim, Mumbai      | India             |

|             |                 |                                                                                       |                          |
|-------------|-----------------|---------------------------------------------------------------------------------------|--------------------------|
| STEPHANIE   | VOORDUIN        | Fundación Hospital Nuestra Señora de la Luz                                           | Mexico                   |
| Gabriela    | Ortega Larrocea | Hospital Médica Sur                                                                   | Mexico                   |
| Sukhum      | Silpa-archa     | Rajavithi Hospital                                                                    | Thailand                 |
| Janet       | Davis           | University of Miami                                                                   | USA                      |
| Eric        | Crowell         | McGovern Medical School                                                               | United States            |
| Edmund      | Tsui            | UCLA Stein Eye Institute                                                              | USA                      |
| Jia-Horung  | Hung            | National Cheng Kung University Hospital                                               | 台灣                       |
| Ramana      | Moorthy         | AVRUC                                                                                 | USA                      |
| Irini       | Chatziralli     | University of Athend                                                                  | Ελλάδα                   |
| Cecilia     | Lee             | University of Washington                                                              | United States            |
| Padmamalini | Mahendradas     | Narayana Nethralaya                                                                   | India                    |
| Lucia       | Kuffova         | NHS Grampian, Aberdeen Royal Infirmery, University of Aberdeen                        | Scotland, UK             |
| Bahram      | Bodaghi         | IHU FOReSIGHT, Sorbonne University, APHP                                              | France                   |
| Harvey      | Uy              | Peregrine Eye and Laser Institute                                                     | Philippines              |
| Sanjay      | Kedhar          | University of California, Irvine                                                      | USA                      |
| Alex        | Kaplan          | University of Toronot                                                                 | Canada                   |
| Robert      | Kuijpers        | 30                                                                                    | Belgium/ The Netherland: |
| Carlos      | Alvarez         | Hospital Zambrano Hellion, Tecnologico de Monterrey                                   | Mexico                   |
| Eva         | Muinos          | Institut catala de retina                                                             | España                   |
| Christoph   | Tappeiner       | Department of Ophthalmology, Inselspital, Bern University Hospital, Bern, Switzerland | Switzerland              |
| raz         | gepstein        | Meir medical center,                                                                  | Israel                   |
| Sofia       | Androudi        | androudi@otenet.gr                                                                    | Greece                   |
| Claudia     | Polo            | Consultorio Hospital                                                                  | Argentina                |
| Kaare       | Clemmensen      | Aarhus universitetshospital                                                           | Denmark                  |
| narsing     | rao             | USC Roski Eye Institute                                                               | usa                      |

|                  |                      |                                                                                                   |                   |
|------------------|----------------------|---------------------------------------------------------------------------------------------------|-------------------|
| Juan Luis        | Sanchez Sevilla      | Marina Baixa Hospital, Villajoyosa, Alicante, Spain                                               | Spain             |
| Alejandra andrea | de-la-Torre leonardi | Universidad del Rosario<br>University of Padova                                                   | Colombia<br>Italy |
| Aleksandra       | Radosavljevic        | University Eye Hospital, Clinical Center of Serbia                                                | Serbia            |
| Luca             | Cimino               | Ocular Immunology Unit, Azienda USL-IRCCS of Reggio Emilia, Italy                                 | Italy             |
| Bouleau          | Julien               | Chr lille                                                                                         | France            |
| Victoria         | Toumanidou           | Interbalkan medical center of Thessaloniki                                                        | Greece            |
| Zohar            | Habot-Wilner         | Tel Aviv Medical Center, Sackler Faculty of Medicine, Tel Aviv University, Israel                 | Israel            |
| J. Fernando      | Arevalo              | Wilmer Eye Institute-Johns Hopkins University                                                     | USA               |
| Marjan           | Imani                | Farabi hospital                                                                                   | Iran              |
| Yogish           | Kamath               | KMC Manipal                                                                                       | India             |
| ZULY             | BARRON               | OftalmoSalud                                                                                      | Peru              |
| amala            | george               | Medical Research Foundation, Sankara Nethralaya, Chennai, India                                   | India             |
| Heloisa          | Nascimento           | UNIFESP                                                                                           | Brazil            |
| PIERRE           | LEFEBVRE             | Messidor Eye Center                                                                               | BELGIUM           |
| Jose Juan        | Mondejar             | Hospital General Universitario de Alicante                                                        | Spain             |
| Daniel Vitor     | Vasconcelos-Santos   | Universidade Federal de Minas Gerais                                                              | Brazil            |
| Kalpana          | Babu                 | Vittala International Institute of Ophthalmology & Prabha Eye Clinic & Research Centre, Bengaluru | India             |
| ZAHEDUR          | RAHMAN               | Bangladesh eye hospital                                                                           | Bangladesh        |
| Sutasinee        | Boonsopon            | Siriraj Hospital, Mahidol University                                                              | Thailand          |
| Luz Elena        | Concha del Rio       | Asociación Para Evitar la Ceguera en Mexico                                                       | Mexico            |

|              |                    |                                                                     |               |
|--------------|--------------------|---------------------------------------------------------------------|---------------|
| massimo      | accorinti          | department of ophthalmology, Sapienza University of Rome            | italy         |
| MIGUEL       | CORDERO-COMA       | University Hospital of León                                         | Spain         |
| Paul         | Yang               | OHSU                                                                | USA           |
| Ann-Marie    | Lobo-Chan          | University of Illinois at Chicago                                   | United States |
| Peter        | Trittibach         | Private practice                                                    | Switzerland   |
| Joanna       | Przeździecka-Dołyk | Wroclaw Medical University, Department of Ophthalmology             | Polska        |
| Elisabetta   | Miserocchi         | San Raffaele Scientific Institute Milano Italy                      | Italy         |
| Alex         | Fonollosa          | Hospital universitario Cruces                                       | España        |
| Ali Osman    | Saatci             | Dokuz Eylul University                                              | Turkey        |
| JORGE ARTURO | AGUILERA PARTIDA   | CLINICA SANTA LUCIA                                                 | MEXICO        |
| Patricia     | Fanlo              | Complejo Hospitalario de Navarra                                    | Spain         |
| Ester        | Carreño            | Hospital Universitario Fundacion Jimenez Diaz                       | Spain         |
| Jim          | Rosenbaum          | Oregon Health & Science and Legacy Devers                           | USA           |
| Manfred      | Zierhut            | University of Tuebingen Department of Ophthalmology                 | Germany       |
| John         | Kempen             | Mass Eye and Ear (Boston, USA)/MCM Eye Unit (Addis Ababa, Ethiopia) | Ethiopia      |
| Manisha      | Agarwal            | Dr Shroff's Charity Eye Hospital                                    | India         |
| Marc         | de Smet            | private                                                             | Switzerland   |
| Peter        | McCluskey          | University of Sydney                                                | Australia     |
