# Supplementary material
Source: PubMed Central journal article supplement (PMC7313529)
Supplement: bjophthalmol-2020-316776s003.pdf [file bjophthalmol-2020-316776s003.pdf]

**Table 1A: Consensus guidelines on immunomodulatory therapy in times of COVID-19 in increased risk patients – As per years of experience and number of uveitis patients on immunomodulatory therapy (IMT) per year**

| Criteria                    |                                             | Uveitis specialists' expertise |                                | Healthy patient – without contact | Healthy patient - with contact | Sick patient – COVID-19 suspected | Sick patient – COVID-19 positive |                |                |                |
|-----------------------------|---------------------------------------------|--------------------------------|--------------------------------|-----------------------------------|--------------------------------|-----------------------------------|----------------------------------|----------------|----------------|----------------|
| <b>ORAL CORTICOSTEROIDS</b> | Patient not on oral corticosteroids         | To be started                  | Years of experience in uveitis | ≤ 15 (n = 80)                     | 72 ( 90 % )                    | 24 ( 30 % )                       | 4 ( 5 % )                        | 5 ( 6.25 % )   |                |                |
|                             |                                             |                                |                                | > 15 (n = 59)                     | 51 ( 86.44 % )                 | 20 ( 33.9 % )                     | 3 ( 5.08 % )                     | 3 ( 5.08 % )   |                |                |
|                             |                                             |                                |                                | Uveitis patients on IMT/year      | < 300 (n = 85)                 | 75 ( 88.24 % )                    | 24 ( 28.24 % )                   | 5 ( 5.88 % )   | 6 ( 7.06 % )   |                |
|                             |                                             |                                |                                |                                   | ≥ 300 (n =54)                  | 48 ( 88.89 % )                    | 20 ( 37.04 % )                   | 2 ( 3.7 % )    | 2 ( 3.7 % )    |                |
|                             | Patient on low dose oral corticosteroids    | To be maintained               | Years of experience in uveitis | ≤ 15 (n = 80)                     | 74 ( 92.5 % )                  | 62 ( 77.5 % )                     | 30 ( 37.5 % )                    | 21 ( 26.25 % ) |                |                |
|                             |                                             |                                |                                | > 15 (n = 59)                     | 58 ( 98.31 % )                 | 50 ( 84.75 % )                    | 27 ( 45.76 % )                   | 17 ( 28.81 % ) |                |                |
|                             |                                             |                                |                                |                                   | Uveitis patients on IMT/year   | < 300 (n = 85)                    | 82 ( 96.47 % )                   | 73 ( 85.88 % ) | 38 ( 44.71 % ) | 25 ( 29.41 % ) |
|                             |                                             |                                |                                |                                   |                                | ≥ 300 (n =54)                     | 50 ( 92.59 % )                   | 39 ( 72.22 % ) | 19 ( 35.19 % ) | 13 ( 24.07 % ) |
|                             |                                             | To be decreased                | Years of experience in uveitis | ≤ 15 (n = 80)                     | 10 ( 12.5 % )                  | 33 ( 41.25 % )                    | 54 ( 67.5 % )                    | 60 ( 75 % )    |                |                |
|                             |                                             |                                |                                | > 15 (n = 59)                     | 1 ( 1.69 % )                   | 18 ( 30.51 % )                    | 38 ( 64.41 % )                   | 44 ( 74.58 % ) |                |                |
|                             |                                             |                                |                                |                                   | Uveitis patients on IMT/year   | < 300 (n = 85)                    | 4 ( 4.71 % )                     | 27 ( 31.76 % ) | 52 ( 61.18 % ) | 62 ( 72.94 % ) |
|                             |                                             |                                |                                |                                   |                                | ≥ 300 (n =54)                     | 7 ( 12.96 % )                    | 24 ( 44.44 % ) | 40 ( 74.07 % ) | 42 ( 77.78 % ) |
|                             |                                             | To be tapered and stopped      | Years of experience in uveitis | ≤ 15 (n = 80)                     | 12 ( 15 % )                    | 27 ( 33.75 % )                    | 52 ( 65 % )                      | 60 ( 75 % )    |                |                |
|                             |                                             |                                |                                | > 15 (n = 59)                     | 1 ( 1.69 % )                   | 11 ( 18.64 % )                    | 31 ( 52.54 % )                   | 38 ( 64.41 % ) |                |                |
|                             |                                             |                                |                                |                                   | Uveitis patients on IMT/year   | < 300 (n = 85)                    | 6 ( 7.06 % )                     | 20 ( 23.53 % ) | 50 ( 58.82 % ) | 60 ( 70.59 % ) |
|                             |                                             |                                |                                |                                   |                                | ≥ 300 (n =54)                     | 7 ( 12.96 % )                    | 18 ( 33.33 % ) | 33 ( 61.11 % ) | 38 ( 70.37 % ) |
|                             | Patient on higher dose oral corticosteroids | To be maintained               | Years of experience in uveitis | ≤ 15 (n = 80)                     | 56 ( 70 % )                    | 25 ( 31.25 % )                    | 15 ( 18.75 % )                   | 9 ( 11.25 % )  |                |                |
|                             |                                             |                                |                                | > 15 (n = 59)                     | 46 ( 77.97 % )                 | 30 ( 50.85 % )                    | 4 ( 6.78 % )                     | 2 ( 3.39 % )   |                |                |
|                             |                                             |                                |                                |                                   | Uveitis patients on IMT/year   | < 300 (n = 85)                    | 67 ( 78.82 % )                   | 37 ( 43.53 % ) | 14 ( 16.47 % ) | 7 ( 8.24 % )   |
|                             |                                             |                                |                                |                                   |                                | ≥ 300 (n =54)                     | 35 ( 64.81 % )                   | 18 ( 33.33 % ) | 5 ( 9.26 % )   | 4 ( 7.41 % )   |
| To be decreased             |                                             | Years of experience in uveitis | ≤ 15 (n = 80)                  | 27 ( 33.75 % )                    | 53 ( 66.25 % )                 | 67 ( 83.75 % )                    | 70 ( 87.5 % )                    |                |                |                |
|                             |                                             |                                | > 15 (n = 59)                  | 11 ( 18.64 % )                    | 27 ( 45.76 % )                 | 50 ( 84.75 % )                    | 55 ( 93.22 % )                   |                |                |                |
|                             |                                             |                                |                                | Uveitis patients on IMT/year      | < 300 (n = 85)                 | 17 ( 20 % )                       | 46 ( 54.12 % )                   | 70 ( 82.35 % ) | 75 ( 88.24 % ) |                |
|                             |                                             |                                |                                |                                   | ≥ 300 (n =54)                  | 21 ( 38.89 % )                    | 34 ( 62.96 % )                   | 47 ( 87.04 % ) | 50 ( 92.59 % ) |                |
| To be tapered and stopped   | Years of experience in uveitis              | ≤ 15 (n = 80)                  | 16 ( 20 % )                    | 34 ( 42.5 % )                     | 60 ( 75 % )                    | 65 ( 81.25 % )                    |                                  |                |                |                |
|                             |                                             | > 15 (n = 59)                  | 5 ( 8.47 % )                   | 18 ( 30.51 % )                    | 39 ( 66.1 % )                  | 42 ( 71.19 % )                    |                                  |                |                |                |

|                               |                                          |                                                |                                |                |                |                |                |                |
|-------------------------------|------------------------------------------|------------------------------------------------|--------------------------------|----------------|----------------|----------------|----------------|----------------|
|                               |                                          |                                                | Uveitis patients on IMT/year   | < 300 (n = 85) | 9 ( 10.59 % )  | 27 ( 31.76 % ) | 60 ( 70.59 % ) | 67 ( 78.82 % ) |
|                               |                                          |                                                |                                | ≥ 300 (n =54)  | 12 ( 22.22 % ) | 25 ( 46.3 % )  | 39 ( 72.22 % ) | 40 ( 74.07 % ) |
| <b>IV METHYL PREDNISOLONE</b> |                                          | To be started                                  | Years of experience in uveitis | ≤ 15 (n = 80)  | 59 ( 73.75 % ) | 18 ( 22.5 % )  | 4 ( 5 % )      | 3 ( 3.75 % )   |
|                               |                                          |                                                |                                | > 15 (n = 59)  | 44 ( 74.58 % ) | 14 ( 23.73 % ) | 2 ( 3.39 % )   | 2 ( 3.39 % )   |
|                               |                                          |                                                | Uveitis patients on IMT/year   | < 300 (n = 85) | 60 ( 70.59 % ) | 18 ( 21.18 % ) | 3 ( 3.53 % )   | 2 ( 2.35 % )   |
|                               |                                          |                                                |                                | ≥ 300 (n =54)  | 43 ( 79.63 % ) | 14 ( 25.93 % ) | 3 ( 5.56 % )   | 3 ( 5.56 % )   |
| <b>LOCAL CORTICOSTEROIDS</b>  | Patient not on oral corticosteroids      | To be preferred to systemic therapy            | Years of experience in uveitis | ≤ 15 (n = 80)  | 53 ( 66.25 % ) | 70 ( 87.5 % )  | 73 ( 91.25 % ) | 70 ( 87.5 % )  |
|                               |                                          |                                                |                                | > 15 (n = 59)  | 30 ( 50.85 % ) | 48 ( 81.36 % ) | 55 ( 93.22 % ) | 52 ( 88.14 % ) |
|                               |                                          |                                                | Uveitis patients on IMT/year   | < 300 (n = 85) | 52 ( 61.18 % ) | 69 ( 81.18 % ) | 76 ( 89.41 % ) | 72 ( 84.71 % ) |
|                               |                                          |                                                |                                | ≥ 300 (n =54)  | 31 ( 57.41 % ) | 49 ( 90.74 % ) | 52 ( 96.3 % )  | 50 ( 92.59 % ) |
|                               | Patient on low dose oral corticosteroids | To be preferred to increasing systemic therapy | Years of experience in uveitis | ≤ 15 (n = 80)  | 55 ( 68.75 % ) | 67 ( 83.75 % ) | 72 ( 90 % )    | 73 ( 91.25 % ) |
|                               |                                          |                                                |                                | > 15 (n = 59)  | 29 ( 49.15 % ) | 45 ( 76.27 % ) | 56 ( 94.92 % ) | 55 ( 93.22 % ) |
|                               |                                          |                                                | Uveitis patients on IMT/year   | < 300 (n = 85) | 52 ( 61.18 % ) | 65 ( 76.47 % ) | 76 ( 89.41 % ) | 77 ( 90.59 % ) |
|                               |                                          |                                                |                                | ≥ 300 (n =54)  | 32 ( 59.26 % ) | 47 ( 87.04 % ) | 52 ( 96.3 % )  | 51 ( 94.44 % ) |
| <b>CONVENTIONAL IMT</b>       | To be started                            | Years of experience in uveitis                 | ≤ 15 (n = 80)                  | 59 ( 73.75 % ) | 21 ( 26.25 % ) | 3 ( 3.75 % )   | 1 ( 1.25 % )   |                |
|                               |                                          |                                                | > 15 (n = 59)                  | 45 ( 76.27 % ) | 17 ( 28.81 % ) | 0              | 0              |                |
|                               |                                          |                                                | Uveitis patients on IMT/year   | < 300 (n = 85) | 65 ( 76.47 % ) | 25 ( 29.41 % ) | 3 ( 3.53 % )   | 1 ( 1.18 % )   |
|                               |                                          |                                                |                                | ≥ 300 (n =54)  | 39 ( 72.22 % ) | 13 ( 24.07 % ) | 0              | 0              |
|                               |                                          | To be maintained                               | Years of experience in uveitis | ≤ 15 (n = 80)  | 77 ( 96.25 % ) | 51 ( 63.75 % ) | 16 ( 20 % )    | 10 ( 12.5 % )  |
|                               |                                          |                                                |                                | > 15 (n = 59)  | 58 ( 98.31 % ) | 44 ( 74.58 % ) | 10 ( 16.95 % ) | 3 ( 5.08 % )   |
|                               |                                          |                                                | Uveitis patients on IMT/year   | < 300 (n = 85) | 81 ( 95.29 % ) | 58 ( 68.24 % ) | 20 ( 23.53 % ) | 9 ( 10.59 % )  |
|                               |                                          |                                                |                                | ≥ 300 (n =54)  | 54 ( 100 % )   | 37 ( 68.52 % ) | 6 ( 11.11 % )  | 4 ( 7.41 % )   |
|                               | To be decreased                          | Years of experience in uveitis                 | ≤ 15 (n = 80)                  | 6 ( 7.5 % )    | 31 ( 38.75 % ) | 62 ( 77.5 % )  | 68 ( 85 % )    |                |
|                               |                                          |                                                | > 15 (n = 59)                  | 3 ( 5.08 % )   | 20 ( 33.9 % )  | 51 ( 86.44 % ) | 55 ( 93.22 % ) |                |
|                               |                                          | Uveitis patients on IMT/year                   | < 300 (n = 85)                 | 5 ( 5.88 % )   | 30 ( 35.29 % ) | 65 ( 76.47 % ) | 73 ( 85.88 % ) |                |
|                               |                                          |                                                | ≥ 300 (n =54)                  | 4 ( 7.41 % )   | 21 ( 38.89 % ) | 48 ( 88.89 % ) | 50 ( 92.59 % ) |                |
|                               | To be stopped                            | Years of experience in uveitis                 | ≤ 15 (n = 80)                  | 4 ( 5 % )      | 22 ( 27.5 % )  | 62 ( 77.5 % )  | 68 ( 85 % )    |                |
|                               |                                          |                                                | > 15 (n = 59)                  | 1 ( 1.69 % )   | 10 ( 16.95 % ) | 45 ( 76.27 % ) | 54 ( 91.53 % ) |                |
|                               |                                          | Uveitis patients on IMT/year                   | < 300 (n = 85)                 | 4 ( 4.71 % )   | 17 ( 20 % )    | 61 ( 71.76 % ) | 73 ( 85.88 % ) |                |
|                               |                                          |                                                | ≥ 300 (n =54)                  | 1 ( 1.85 % )   | 15 ( 27.78 % ) | 46 ( 85.19 % ) | 49 ( 90.74 % ) |                |

**Table 1B:** Consensus guidelines on immunomodulatory therapy in times of COVID-19 in increased risk patients – As per **geographical location of practice.**

|                             |                                           |                           | Experts' geographical area | Healthy patient | Healthy patient – with contact | Sick patient – COVID-19 suspected | Sick patient – COVID-19 positive |
|-----------------------------|-------------------------------------------|---------------------------|----------------------------|-----------------|--------------------------------|-----------------------------------|----------------------------------|
| <b>ORAL CORTICOSTEROIDS</b> | Patients not on oral corticosteroids      | To be started             | Asia (n = 44)              | 42 ( 95.45 % )  | 12 ( 27.27 % )                 | 1 ( 2.27 % )                      | 1 ( 2.27 % )                     |
|                             |                                           |                           | Africa (n = 3)             | 2 ( 66.67 % )   | 0                              | 0                                 | 0                                |
|                             |                                           |                           | Europe (n = 43)            | 34 ( 79.07 % )  | 13 ( 30.23 % )                 | 3 ( 6.98 % )                      | 5 ( 11.63 % )                    |
|                             |                                           |                           | North America (n = 34)     | 33 ( 97.06 % )  | 15 ( 44.12 % )                 | 3 ( 8.82 % )                      | 2 ( 5.88 % )                     |
|                             |                                           |                           | South America (n =7)       | 5 ( 71.43 % )   | 0                              | 0                                 | 0                                |
|                             |                                           |                           | Oceania (n = 8)            | 7 ( 87.5 % )    | 4 ( 50 % )                     | 0                                 | 0                                |
|                             | Patients on low dose oral corticosteroids | To be maintained          | Asia (n = 44)              | 42 ( 95.45 % )  | 31 ( 70.45 % )                 | 6 ( 13.64 % )                     | 4 ( 9.09 % )                     |
|                             |                                           |                           | Africa (n = 3)             | 3 ( 100 % )     | 3 ( 100 % )                    | 1 ( 33.33 % )                     | 1 ( 33.33 % )                    |
|                             |                                           |                           | Europe (n = 43)            | 42 ( 97.67 % )  | 37 ( 86.05 % )                 | 24 ( 55.81 % )                    | 14 ( 32.56 % )                   |
|                             |                                           |                           | North America (n = 34)     | 33 ( 97.06 % )  | 31 ( 91.18 % )                 | 19 ( 55.88 % )                    | 13 ( 38.24 % )                   |
|                             |                                           |                           | South America (n =7)       | 6 ( 85.71 % )   | 5 ( 71.43 % )                  | 2 ( 28.57 % )                     | 2 ( 28.57 % )                    |
|                             |                                           |                           | Oceania (n = 8)            | 6 ( 75 % )      | 5 ( 62.5 % )                   | 5 ( 62.5 % )                      | 4 ( 50 % )                       |
|                             |                                           | To be decreased           | Asia (n = 44)              | 5 ( 11.36 % )   | 29 ( 65.91 % )                 | 40 ( 90.91 % )                    | 42 ( 95.45 % )                   |
|                             |                                           |                           | Africa (n = 3)             | 0               | 0                              | 2 ( 66.67 % )                     | 2 ( 66.67 % )                    |
|                             |                                           |                           | Europe (n = 43)            | 2 ( 4.65 % )    | 9 ( 20.93 % )                  | 20 ( 46.51 % )                    | 25 ( 58.14 % )                   |
|                             |                                           |                           | North America (n = 34)     | 1 ( 2.94 % )    | 7 ( 20.59 % )                  | 21 ( 61.76 % )                    | 25 ( 73.53 % )                   |
|                             |                                           |                           | South America (n =7)       | 1 ( 14.29 % )   | 3 ( 42.86 % )                  | 5 ( 71.43 % )                     | 5 ( 71.43 % )                    |
|                             |                                           |                           | Oceania (n = 8)            | 2 ( 25 % )      | 3 ( 37.5 % )                   | 4 ( 50 % )                        | 5 ( 62.5 % )                     |
|                             |                                           | To be tapered and stopped | Asia (n = 44)              | 5 ( 11.36 % )   | 22 ( 50 % )                    | 39 ( 88.64 % )                    | 42 ( 95.45 % )                   |
|                             |                                           |                           | Africa (n = 3)             | 0               | 0                              | 2 ( 66.67 % )                     | 2 ( 66.67 % )                    |
|                             |                                           |                           | Europe (n = 43)            | 3 ( 6.98 % )    | 6 ( 13.95 % )                  | 17 ( 39.53 % )                    | 23 ( 53.49 % )                   |
|                             |                                           |                           | North America (n = 34)     | 2 ( 5.88 % )    | 5 ( 14.71 % )                  | 17 ( 50 % )                       | 22 ( 64.71 % )                   |
|                             |                                           |                           | South America (n =7)       | 1 ( 14.29 % )   | 3 ( 42.86 % )                  | 5 ( 71.43 % )                     | 5 ( 71.43 % )                    |
|                             |                                           |                           | Oceania (n = 8)            | 2 ( 25 % )      | 2 ( 25 % )                     | 3 ( 37.5 % )                      | 4 ( 50 % )                       |

|                        |                                              |                                     |                        |                |                |                |                |
|------------------------|----------------------------------------------|-------------------------------------|------------------------|----------------|----------------|----------------|----------------|
|                        | Patients on higher dose oral corticosteroids | To be maintained                    | Asia (n = 44)          | 32 ( 72.73 % ) | 11 ( 25 % )    | 3 ( 6.82 % )   | 2 ( 4.55 % )   |
|                        |                                              |                                     | Africa (n = 3)         | 3 ( 100 % )    | 1 ( 33.33 % )  | 0              | 0              |
|                        |                                              |                                     | Europe (n = 43)        | 33 ( 76.74 % ) | 23 ( 53.49 % ) | 11 ( 25.58 % ) | 6 ( 13.95 % )  |
|                        |                                              |                                     | North America (n = 34) | 24 ( 70.59 % ) | 15 ( 44.12 % ) | 4 ( 11.76 % )  | 3 ( 8.82 % )   |
|                        |                                              |                                     | South America (n =7)   | 5 ( 71.43 % )  | 1 ( 14.29 % )  | 0              | 0              |
|                        |                                              |                                     | Oceania (n = 8)        | 5 ( 62.5 % )   | 4 ( 50 % )     | 1 ( 12.5 % )   | 0              |
|                        |                                              | To be decreased                     | Asia (n = 44)          | 14 ( 31.82 % ) | 31 ( 70.45 % ) | 40 ( 90.91 % ) | 42 ( 95.45 % ) |
|                        |                                              |                                     | Africa (n = 3)         | 0              | 2 ( 66.67 % )  | 3 ( 100 % )    | 3 ( 100 % )    |
|                        |                                              |                                     | Europe (n = 43)        | 11 ( 25.58 % ) | 21 ( 48.84 % ) | 31 ( 72.09 % ) | 34 ( 79.07 % ) |
|                        |                                              |                                     | North America (n = 34) | 8 ( 23.53 % )  | 16 ( 47.06 % ) | 29 ( 85.29 % ) | 31 ( 91.18 % ) |
|                        |                                              |                                     | South America (n =7)   | 2 ( 28.57 % )  | 6 ( 85.71 % )  | 7 ( 100 % )    | 7 ( 100 % )    |
|                        |                                              |                                     | Oceania (n = 8)        | 3 ( 37.5 % )   | 4 ( 50 % )     | 7 ( 87.5 % )   | 8 ( 100 % )    |
|                        |                                              | To be tapered and stopped           | Asia (n = 44)          | 8 ( 18.18 % )  | 26 ( 59.09 % ) | 39 ( 88.64 % ) | 40 ( 90.91 % ) |
|                        |                                              |                                     | Africa (n = 3)         | 0              | 0              | 3 ( 100 % )    | 3 ( 100 % )    |
|                        |                                              |                                     | Europe (n = 43)        | 4 ( 9.3 % )    | 11 ( 25.58 % ) | 24 ( 55.81 % ) | 25 ( 58.14 % ) |
|                        |                                              |                                     | North America (n = 34) | 4 ( 11.76 % )  | 9 ( 26.47 % )  | 21 ( 61.76 % ) | 26 ( 76.47 % ) |
|                        |                                              |                                     | South America (n =7)   | 2 ( 28.57 % )  | 3 ( 42.86 % )  | 5 ( 71.43 % )  | 5 ( 71.43 % )  |
|                        |                                              |                                     | Oceania (n = 8)        | 3 ( 37.5 % )   | 3 ( 37.5 % )   | 7 ( 87.5 % )   | 8 ( 100 % )    |
| IV METHYL PREDNISOLONE |                                              | To be started                       | Asia (n = 44)          | 31 ( 70.45 % ) | 8 ( 18.18 % )  | 0              | 0              |
|                        |                                              |                                     | Africa (n = 3)         | 0              | 0              | 0              | 0              |
|                        |                                              |                                     | Europe (n = 43)        | 30 ( 69.77 % ) | 10 ( 23.26 % ) | 4 ( 9.3 % )    | 3 ( 6.98 % )   |
|                        |                                              |                                     | North America (n = 34) | 32 ( 94.12 % ) | 12 ( 35.29 % ) | 1 ( 2.94 % )   | 1 ( 2.94 % )   |
|                        |                                              |                                     | South America (n =7)   | 4 ( 57.14 % )  | 0              | 1 ( 14.29 % )  | 1 ( 14.29 % )  |
|                        |                                              |                                     | Oceania (n = 8)        | 6 ( 75 % )     | 2 ( 25 % )     | 0              | 0              |
| LOCAL CORTICOSTEROIDS  | Patients not on oral corticosteroids         | To be preferred to systemic therapy | Asia (n = 44)          | 25 ( 56.82 % ) | 39 ( 88.64 % ) | 40 ( 90.91 % ) | 37 ( 84.09 % ) |
|                        |                                              |                                     | Africa (n = 3)         | 0              | 2 ( 66.67 % )  | 3 ( 100 % )    | 3 ( 100 % )    |
|                        |                                              |                                     | Europe (n = 43)        | 28 ( 65.12 % ) | 36 ( 83.72 % ) | 41 ( 95.35 % ) | 40 ( 93.02 % ) |
|                        |                                              |                                     | North America (n = 34) | 22 ( 64.71 % ) | 28 ( 82.35 % ) | 29 ( 85.29 % ) | 27 ( 79.41 % ) |
|                        |                                              |                                     | South America (n =7)   | 3 ( 42.86 % )  | 7 ( 100 % )    | 7 ( 100 % )    | 7 ( 100 % )    |
|                        |                                              |                                     | Oceania (n = 8)        | 5 ( 62.5 % )   | 6 ( 75 % )     | 8 ( 100 % )    | 8 ( 100 % )    |

|                         |                                           |                                                |                        |                |                |                |                |
|-------------------------|-------------------------------------------|------------------------------------------------|------------------------|----------------|----------------|----------------|----------------|
|                         | Patients on low dose oral corticosteroids | To be preferred to increasing systemic therapy | Asia (n = 44)          | 27 ( 61.36 % ) | 36 ( 81.82 % ) | 41 ( 93.18 % ) | 40 ( 90.91 % ) |
|                         |                                           |                                                | Africa (n = 3)         | 1 ( 33.33 % )  | 3 ( 100 % )    | 3 ( 100 % )    | 3 ( 100 % )    |
|                         |                                           |                                                | Europe (n = 43)        | 27 ( 62.79 % ) | 36 ( 83.72 % ) | 40 ( 93.02 % ) | 41 ( 95.35 % ) |
|                         |                                           |                                                | North America (n = 34) | 23 ( 67.65 % ) | 26 ( 76.47 % ) | 29 ( 85.29 % ) | 29 ( 85.29 % ) |
|                         |                                           |                                                | South America (n =7)   | 3 ( 42.86 % )  | 6 ( 85.71 % )  | 7 ( 100 % )    | 7 ( 100 % )    |
|                         |                                           |                                                | Oceania (n = 8)        | 3 ( 37.5 % )   | 5 ( 62.5 % )   | 8 ( 100 % )    | 8 ( 100 % )    |
| <b>CONVENTIONAL IMT</b> | To be started                             | Asia (n = 44)                                  | 38 ( 86.36 % )         | 13 ( 29.55 % ) | 3 ( 6.82 % )   | 1 ( 2.27 % )   |                |
|                         |                                           | Africa (n = 3)                                 | 1 ( 33.33 % )          | 1 ( 33.33 % )  | 0              | 0              |                |
|                         |                                           | Europe (n = 43)                                | 27 ( 62.79 % )         | 6 ( 13.95 % )  | 0              | 0              |                |
|                         |                                           | North America (n = 34)                         | 28 ( 82.35 % )         | 13 ( 38.24 % ) | 0              | 0              |                |
|                         |                                           | South America (n =7)                           | 4 ( 57.14 % )          | 2 ( 28.57 % )  | 0              | 0              |                |
|                         |                                           | Oceania (n = 8)                                | 6 ( 75 % )             | 3 ( 37.5 % )   | 0              | 0              |                |
|                         | To be maintained                          | Asia (n = 44)                                  | 41 ( 93.18 % )         | 22 ( 50 % )    | 4 ( 9.09 % )   | 3 ( 6.82 % )   |                |
|                         |                                           | Africa (n = 3)                                 | 3 ( 100 % )            | 1 ( 33.33 % )  | 1 ( 33.33 % )  | 1 ( 33.33 % )  |                |
|                         |                                           | Europe (n = 43)                                | 43 ( 100 % )           | 36 ( 83.72 % ) | 12 ( 27.91 % ) | 4 ( 9.3 % )    |                |
|                         |                                           | North America (n = 34)                         | 33 ( 97.06 % )         | 25 ( 73.53 % ) | 8 ( 23.53 % )  | 5 ( 14.71 % )  |                |
|                         |                                           | South America (n =7)                           | 7 ( 100 % )            | 3 ( 42.86 % )  | 0              | 0              |                |
|                         |                                           | Oceania (n = 8)                                | 8 ( 100 % )            | 8 ( 100 % )    | 1 ( 12.5 % )   | 0              |                |
|                         | To be decreased                           | Asia (n = 44)                                  | 4 ( 9.09 % )           | 23 ( 52.27 % ) | 39 ( 88.64 % ) | 41 ( 93.18 % ) |                |
|                         |                                           | Africa (n = 3)                                 | 0                      | 2 ( 66.67 % )  | 3 ( 100 % )    | 3 ( 100 % )    |                |
|                         |                                           | Europe (n = 43)                                | 2 ( 4.65 % )           | 11 ( 25.58 % ) | 30 ( 69.77 % ) | 34 ( 79.07 % ) |                |
|                         |                                           | North America (n = 34)                         | 1 ( 2.94 % )           | 9 ( 26.47 % )  | 26 ( 76.47 % ) | 30 ( 88.24 % ) |                |
|                         |                                           | South America (n =7)                           | 0                      | 4 ( 57.14 % )  | 7 ( 100 % )    | 7 ( 100 % )    |                |
|                         |                                           | Oceania (n = 8)                                | 2 ( 25 % )             | 2 ( 25 % )     | 8 ( 100 % )    | 8 ( 100 % )    |                |
|                         | To be stopped                             | Asia (n = 44)                                  | 2 ( 4.55 % )           | 17 ( 38.64 % ) | 38 ( 86.36 % ) | 41 ( 93.18 % ) |                |
|                         |                                           | Africa (n = 3)                                 | 0                      | 0              | 2 ( 66.67 % )  | 2 ( 66.67 % )  |                |
|                         |                                           | Europe (n = 43)                                | 2 ( 4.65 % )           | 6 ( 13.95 % )  | 30 ( 69.77 % ) | 34 ( 79.07 % ) |                |
|                         |                                           | North America (n = 34)                         | 1 ( 2.94 % )           | 7 ( 20.59 % )  | 25 ( 73.53 % ) | 30 ( 88.24 % ) |                |
|                         |                                           | South America (n =7)                           | 0                      | 2 ( 28.57 % )  | 6 ( 85.71 % )  | 7 ( 100 % )    |                |
|                         |                                           | Oceania (n = 8)                                | 0                      | 0              | 6 ( 75 % )     | 8 ( 100 % )    |                |

Consensus for "No"

Consensus for "Yes"

\*Increased risk category: patients with uveitis or rheumatologic disease on immunosuppressives (not on biologics)
