# Supplementary material
Source: PubMed Central journal article supplement (PMC7313529)
Supplement: bjophthalmol-2020-316776s004.pdf [file bjophthalmol-2020-316776s004.pdf]

**Table 2A: Consensus guidelines on immunomodulatory therapy in times of COVID-19 in High risk patients – As per years of experience and uveitis patients per year**

|                             |                                             |                                | Uveitis specialists' expertise |                | Healthy patient – without contact | Healthy patient – with contact | Sick patient - COVID-19 suspected | Sick patient - COVID-19 positive |
|-----------------------------|---------------------------------------------|--------------------------------|--------------------------------|----------------|-----------------------------------|--------------------------------|-----------------------------------|----------------------------------|
| <b>ORAL CORTICOSTEROIDS</b> | Patient not on oral corticosteroids         | To be started                  | Years of experience in uveitis | ≤ 15 (n = 80)  | 56 ( 70 % )                       | 24 ( 30 % )                    | 5 ( 6.25 % )                      | 3 ( 3.75 % )                     |
|                             |                                             |                                |                                | > 15 (n = 59)  | 42 ( 71.19 % )                    | 19 ( 32.2 % )                  | 2 ( 3.39 % )                      | 2 ( 3.39 % )                     |
|                             |                                             |                                | Uveitis patients on IMT/year   | < 300 (n = 85) | 61 ( 71.76 % )                    | 27 ( 31.76 % )                 | 5 ( 5.88 % )                      | 4 ( 4.71 % )                     |
|                             |                                             |                                |                                | ≥ 300 (n =54)  | 37 ( 68.52 % )                    | 16 ( 29.63 % )                 | 2 ( 3.7 % )                       | 1 ( 1.85 % )                     |
|                             | Patient on low dose oral corticosteroids    | To be maintained               | Years of experience in uveitis | ≤ 15 (n = 80)  | 74 ( 92.5 % )                     | 38 ( 47.5 % )                  | 18 ( 22.5 % )                     | 13 ( 16.25 % )                   |
|                             |                                             |                                |                                | > 15 (n = 59)  | 55 ( 93.22 % )                    | 39 ( 66.1 % )                  | 18 ( 30.51 % )                    | 15 ( 25.42 % )                   |
|                             |                                             |                                | Uveitis patients on IMT/year   | < 300 (n = 85) | 80 ( 94.12 % )                    | 49 ( 57.65 % )                 | 22 ( 25.88 % )                    | 15 ( 17.65 % )                   |
|                             |                                             |                                |                                | ≥ 300 (n =54)  | 49 ( 90.74 % )                    | 28 ( 51.85 % )                 | 14 ( 25.93 % )                    | 13 ( 24.07 % )                   |
|                             |                                             | To be decreased                | Years of experience in uveitis | ≤ 15 (n = 80)  | 16 ( 20 % )                       | 48 ( 60 % )                    | 62 ( 77.5 % )                     | 67 ( 83.75 % )                   |
|                             |                                             |                                |                                | > 15 (n = 59)  | 6 ( 10.17 % )                     | 27 ( 45.76 % )                 | 41 ( 69.49 % )                    | 44 ( 74.58 % )                   |
|                             |                                             |                                | Uveitis patients on IMT/year   | < 300 (n = 85) | 9 ( 10.59 % )                     | 43 ( 50.59 % )                 | 60 ( 70.59 % )                    | 66 ( 77.65 % )                   |
|                             |                                             |                                |                                | ≥ 300 (n =54)  | 13 ( 24.07 % )                    | 32 ( 59.26 % )                 | 43 ( 79.63 % )                    | 45 ( 83.33 % )                   |
|                             |                                             | To be tapered and stopped      | Years of experience in uveitis | ≤ 15 (n = 80)  | 11 ( 13.75 % )                    | 40 ( 50 % )                    | 60 ( 75 % )                       | 66 ( 82.5 % )                    |
|                             |                                             |                                |                                | > 15 (n = 59)  | 5 ( 8.47 % )                      | 22 ( 37.29 % )                 | 38 ( 64.41 % )                    | 39 ( 66.1 % )                    |
|                             |                                             |                                | Uveitis patients on IMT/year   | < 300 (n = 85) | 7 ( 8.24 % )                      | 35 ( 41.18 % )                 | 61 ( 71.76 % )                    | 65 ( 76.47 % )                   |
|                             |                                             |                                |                                | ≥ 300 (n =54)  | 9 ( 16.67 % )                     | 27 ( 50 % )                    | 37 ( 68.52 % )                    | 40 ( 74.07 % )                   |
|                             | Patient on higher dose oral corticosteroids | To be maintained               | Years of experience in uveitis | ≤ 15 (n = 80)  | 46 ( 57.5 % )                     | 24 ( 30 % )                    | 9 ( 11.25 % )                     | 6 ( 7.5 % )                      |
|                             |                                             |                                |                                | > 15 (n = 59)  | 40 ( 67.8 % )                     | 19 ( 32.2 % )                  | 8 ( 13.56 % )                     | 4 ( 6.78 % )                     |
|                             |                                             |                                | Uveitis patients on IMT/year   | < 300 (n = 85) | 56 ( 65.88 % )                    | 28 ( 32.94 % )                 | 13 ( 15.29 % )                    | 6 ( 7.06 % )                     |
|                             |                                             |                                |                                | ≥ 300 (n =54)  | 30 ( 55.56 % )                    | 15 ( 27.78 % )                 | 4 ( 7.41 % )                      | 4 ( 7.41 % )                     |
| To be decreased             |                                             | Years of experience in uveitis | ≤ 15 (n = 80)                  | 40 ( 50 % )    | 59 ( 73.75 % )                    | 71 ( 88.75 % )                 | 74 ( 92.5 % )                     |                                  |
|                             |                                             |                                | > 15 (n = 59)                  | 23 ( 38.98 % ) | 37 ( 62.71 % )                    | 52 ( 88.14 % )                 | 54 ( 91.53 % )                    |                                  |
|                             |                                             | Uveitis patients on IMT/year   | < 300 (n = 85)                 | 33 ( 38.82 % ) | 54 ( 63.53 % )                    | 72 ( 84.71 % )                 | 77 ( 90.59 % )                    |                                  |
|                             |                                             |                                | ≥ 300 (n =54)                  | 30 ( 55.56 % ) | 42 ( 77.78 % )                    | 51 ( 94.44 % )                 | 51 ( 94.44 % )                    |                                  |
| To be tapered               | Years of experience                         | ≤ 15 (n = 80)                  | 23 ( 28.75 % )                 | 46 ( 57.5 % )  | 65 ( 81.25 % )                    | 72 ( 90 % )                    |                                   |                                  |

|                               |                                             |                                                   |                                   |                                   |                |                |                |                |              |
|-------------------------------|---------------------------------------------|---------------------------------------------------|-----------------------------------|-----------------------------------|----------------|----------------|----------------|----------------|--------------|
|                               |                                             | and stopped                                       | in uveitis                        | > 15 (n = 59)                     | 11 ( 18.64 % ) | 24 ( 40.68 % ) | 45 ( 76.27 % ) | 46 ( 77.97 % ) |              |
|                               |                                             |                                                   | Uveitis patients on<br>IMT/year   | < 300 (n = 85)                    | 20 ( 23.53 % ) | 40 ( 47.06 % ) | 67 ( 78.82 % ) | 75 ( 88.24 % ) |              |
|                               |                                             |                                                   |                                   | ≥ 300 (n =54)                     | 14 ( 25.93 % ) | 30 ( 55.56 % ) | 43 ( 79.63 % ) | 43 ( 79.63 % ) |              |
| <b>IV METHYL PREDNISOLONE</b> |                                             | To be started                                     | Years of experience<br>in uveitis | ≤ 15 (n = 80)                     | 41 ( 51.25 % ) | 15 ( 18.75 % ) | 5 ( 6.25 % )   | 4 ( 5 % )      |              |
|                               |                                             |                                                   |                                   | > 15 (n = 59)                     | 32 ( 54.24 % ) | 10 ( 16.95 % ) | 2 ( 3.39 % )   | 2 ( 3.39 % )   |              |
|                               |                                             |                                                   | Uveitis patients on<br>IMT/year   | < 300 (n = 85)                    | 45 ( 52.94 % ) | 15 ( 17.65 % ) | 4 ( 4.71 % )   | 3 ( 3.53 % )   |              |
|                               |                                             |                                                   |                                   | ≥ 300 (n =54)                     | 28 ( 51.85 % ) | 10 ( 18.52 % ) | 3 ( 5.56 % )   | 3 ( 5.56 % )   |              |
| <b>LOCAL CORTICOSTEROIDS</b>  | Patient not on<br>oral corticosteroids      | To be preferred to<br>systemic therapy            | Years of experience<br>in uveitis | ≤ 15 (n = 80)                     | 59 ( 73.75 % ) | 70 ( 87.5 % )  | 70 ( 87.5 % )  | 69 ( 86.25 % ) |              |
|                               |                                             |                                                   |                                   | > 15 (n = 59)                     | 42 ( 71.19 % ) | 52 ( 88.14 % ) | 53 ( 89.83 % ) | 53 ( 89.83 % ) |              |
|                               |                                             |                                                   | Uveitis patients on<br>IMT/year   | < 300 (n = 85)                    | 63 ( 74.12 % ) | 74 ( 87.06 % ) | 72 ( 84.71 % ) | 72 ( 84.71 % ) |              |
|                               |                                             |                                                   |                                   | ≥ 300 (n =54)                     | 38 ( 70.37 % ) | 48 ( 88.89 % ) | 51 ( 94.44 % ) | 50 ( 92.59 % ) |              |
|                               | Patient on low dose<br>oral corticosteroids | To be preferred to<br>increasing systemic therapy | Years of experience<br>in uveitis | ≤ 15 (n = 80)                     | 62 ( 77.5 % )  | 72 ( 90 % )    | 72 ( 90 % )    | 69 ( 86.25 % ) |              |
|                               |                                             |                                                   |                                   | > 15 (n = 59)                     | 44 ( 74.58 % ) | 49 ( 83.05 % ) | 54 ( 91.53 % ) | 53 ( 89.83 % ) |              |
|                               |                                             |                                                   | Uveitis patients on<br>IMT/year   | < 300 (n = 85)                    | 64 ( 75.29 % ) | 73 ( 85.88 % ) | 74 ( 87.06 % ) | 73 ( 85.88 % ) |              |
|                               |                                             |                                                   |                                   | ≥ 300 (n =54)                     | 42 ( 77.78 % ) | 48 ( 88.89 % ) | 52 ( 96.3 % )  | 49 ( 90.74 % ) |              |
| <b>CONVENTIONAL IMT</b>       |                                             | To be started                                     | Years of experience<br>in uveitis | ≤ 15 (n = 80)                     | 44 ( 55 % )    | 19 ( 23.75 % ) | 6 ( 7.5 % )    | 3 ( 3.75 % )   |              |
|                               |                                             |                                                   |                                   | > 15 (n = 59)                     | 38 ( 64.41 % ) | 17 ( 28.81 % ) | 1 ( 1.69 % )   | 0              |              |
|                               |                                             |                                                   | Uveitis patients on<br>IMT/year   | < 300 (n = 85)                    | 52 ( 61.18 % ) | 22 ( 25.88 % ) | 4 ( 4.71 % )   | 2 ( 2.35 % )   |              |
|                               |                                             |                                                   |                                   | ≥ 300 (n =54)                     | 30 ( 55.56 % ) | 14 ( 25.93 % ) | 3 ( 5.56 % )   | 1 ( 1.85 % )   |              |
|                               |                                             |                                                   | To be maintained                  | Years of experience<br>in uveitis | ≤ 15 (n = 80)  | 71 ( 88.75 % ) | 39 ( 48.75 % ) | 10 ( 12.5 % )  | 6 ( 7.5 % )  |
|                               |                                             |                                                   |                                   |                                   | > 15 (n = 59)  | 54 ( 91.53 % ) | 33 ( 55.93 % ) | 8 ( 13.56 % )  | 5 ( 8.47 % ) |
|                               |                                             | Uveitis patients on<br>IMT/year                   |                                   | < 300 (n = 85)                    | 75 ( 88.24 % ) | 43 ( 50.59 % ) | 14 ( 16.47 % ) | 7 ( 8.24 % )   |              |
|                               |                                             |                                                   |                                   | ≥ 300 (n =54)                     | 50 ( 92.59 % ) | 29 ( 53.7 % )  | 4 ( 7.41 % )   | 4 ( 7.41 % )   |              |
|                               |                                             | to be decreased                                   | Years of experience<br>in uveitis | ≤ 15 (n = 80)                     | 13 ( 16.25 % ) | 42 ( 52.5 % )  | 67 ( 83.75 % ) | 71 ( 88.75 % ) |              |
|                               |                                             |                                                   |                                   | > 15 (n = 59)                     | 5 ( 8.47 % )   | 29 ( 49.15 % ) | 49 ( 83.05 % ) | 50 ( 84.75 % ) |              |
|                               |                                             |                                                   | Uveitis patients on<br>IMT/year   | < 300 (n = 85)                    | 11 ( 12.94 % ) | 41 ( 48.24 % ) | 68 ( 80 % )    | 75 ( 88.24 % ) |              |
|                               |                                             |                                                   |                                   | ≥ 300 (n =54)                     | 7 ( 12.96 % )  | 30 ( 55.56 % ) | 48 ( 88.89 % ) | 46 ( 85.19 % ) |              |
|                               |                                             | To be stopped                                     | Years of experience<br>in uveitis | ≤ 15 (n = 80)                     | 7 ( 8.75 % )   | 28 ( 35 % )    | 64 ( 80 % )    | 72 ( 90 % )    |              |
|                               |                                             |                                                   |                                   | > 15 (n = 59)                     | 5 ( 8.47 % )   | 21 ( 35.59 % ) | 48 ( 81.36 % ) | 51 ( 86.44 % ) |              |

|                    |                 |                                   |                |                |                |                |                |
|--------------------|-----------------|-----------------------------------|----------------|----------------|----------------|----------------|----------------|
|                    |                 | Uveitis patients on<br>IMT/year   | < 300 (n = 85) | 9 ( 10.59 % )  | 31 ( 36.47 % ) | 63 ( 74.12 % ) | 73 ( 85.88 % ) |
|                    |                 |                                   | ≥ 300 (n =54)  | 3 ( 5.56 % )   | 18 ( 33.33 % ) | 49 ( 90.74 % ) | 50 ( 92.59 % ) |
| <b>BIOLOGICS</b>   | To be started   | Years of experience<br>in uveitis | ≤ 15 (n = 80)  | 37 ( 46.25 % ) | 10 ( 12.5 % )  | 3 ( 3.75 % )   | 4 ( 5 % )      |
|                    |                 |                                   | > 15 (n = 59)  | 32 ( 54.24 % ) | 13 ( 22.03 % ) | 3 ( 5.08 % )   | 2 ( 3.39 % )   |
|                    |                 | Uveitis patients on<br>IMT/year   | < 300 (n = 85) | 42 ( 49.41 % ) | 11 ( 12.94 % ) | 3 ( 3.53 % )   | 4 ( 4.71 % )   |
|                    |                 |                                   | ≥ 300 (n =54)  | 27 ( 50 % )    | 12 ( 22.22 % ) | 3 ( 5.56 % )   | 2 ( 3.7 % )    |
|                    | To be continued | Years of experience<br>in uveitis | ≤ 15 (n = 80)  | 71 ( 88.75 % ) | 40 ( 50 % )    | 12 ( 15 % )    | 6 ( 7.5 % )    |
|                    |                 |                                   | > 15 (n = 59)  | 52 ( 88.14 % ) | 33 ( 55.93 % ) | 6 ( 10.17 % )  | 4 ( 6.78 % )   |
|                    |                 | Uveitis patients on<br>IMT/year   | < 300 (n = 85) | 72 ( 84.71 % ) | 42 ( 49.41 % ) | 14 ( 16.47 % ) | 8 ( 9.41 % )   |
|                    |                 |                                   | ≥ 300 (n =54)  | 51 ( 94.44 % ) | 31 ( 57.41 % ) | 4 ( 7.41 % )   | 2 ( 3.7 % )    |
|                    | To be stopped   | Years of experience<br>in uveitis | ≤ 15 (n = 80)  | 9 ( 11.25 % )  | 41 ( 51.25 % ) | 69 ( 86.25 % ) | 71 ( 88.75 % ) |
|                    |                 |                                   | > 15 (n = 59)  | 8 ( 13.56 % )  | 22 ( 37.29 % ) | 47 ( 79.66 % ) | 52 ( 88.14 % ) |
|                    |                 | Uveitis patients on<br>IMT/year   | < 300 (n = 85) | 10 ( 11.76 % ) | 39 ( 45.88 % ) | 69 ( 81.18 % ) | 75 ( 88.24 % ) |
|                    |                 |                                   | ≥ 300 (n =54)  | 7 ( 12.96 % )  | 24 ( 44.44 % ) | 47 ( 87.04 % ) | 48 ( 88.89 % ) |
| <b>TOCILIZUMAB</b> | To be started   | Years of experience<br>in uveitis | ≤ 15 (n = 80)  | 44 ( 55 % )    | 30 ( 37.5 % )  | 22 ( 27.5 % )  | 22 ( 27.5 % )  |
|                    |                 |                                   | > 15 (n = 59)  | 41 ( 69.49 % ) | 27 ( 45.76 % ) | 17 ( 28.81 % ) | 18 ( 30.51 % ) |
|                    |                 | Uveitis patients on<br>IMT/year   | < 300 (n = 85) | 50 ( 58.82 % ) | 31 ( 36.47 % ) | 22 ( 25.88 % ) | 23 ( 27.06 % ) |
|                    |                 |                                   | ≥ 300 (n =54)  | 35 ( 64.81 % ) | 26 ( 48.15 % ) | 17 ( 31.48 % ) | 17 ( 31.48 % ) |
|                    | To be continued | Years of experience<br>in uveitis | ≤ 15 (n = 80)  | 71 ( 88.75 % ) | 54 ( 67.5 % )  | 33 ( 41.25 % ) | 31 ( 38.75 % ) |
|                    |                 |                                   | > 15 (n = 59)  | 57 ( 96.61 % ) | 44 ( 74.58 % ) | 33 ( 55.93 % ) | 31 ( 52.54 % ) |
|                    |                 | Uveitis patients on<br>IMT/year   | < 300 (n = 85) | 76 ( 89.41 % ) | 55 ( 64.71 % ) | 40 ( 47.06 % ) | 37 ( 43.53 % ) |
|                    |                 |                                   | ≥ 300 (n =54)  | 52 ( 96.3 % )  | 43 ( 79.63 % ) | 26 ( 48.15 % ) | 25 ( 46.3 % )  |
|                    | To switch to    | Years of experience<br>in uveitis | ≤ 15 (n = 80)  | 28 ( 35 % )    | 20 ( 25 % )    | 21 ( 26.25 % ) | 24 ( 30 % )    |
|                    |                 |                                   | > 15 (n = 59)  | 16 ( 27.12 % ) | 12 ( 20.34 % ) | 20 ( 33.9 % )  | 21 ( 35.59 % ) |
|                    |                 | Uveitis patients on<br>IMT/year   | < 300 (n = 85) | 31 ( 36.47 % ) | 21 ( 24.71 % ) | 25 ( 29.41 % ) | 29 ( 34.12 % ) |
|                    |                 |                                   | ≥ 300 (n =54)  | 13 ( 24.07 % ) | 11 ( 20.37 % ) | 16 ( 29.63 % ) | 16 ( 29.63 % ) |

**Table 2B: Consensus guidelines on immunomodulatory therapy in times of COVID-19 in High risk patients – As per geographical region**

|                             |                                          |                           | Experts' geographical area | Healthy patient – without contact | Healthy patient – with contact | Sick patient – COVID-19 suspected | Sick patient – COVID-19 positive |
|-----------------------------|------------------------------------------|---------------------------|----------------------------|-----------------------------------|--------------------------------|-----------------------------------|----------------------------------|
| <b>ORAL CORTICOSTEROIDS</b> | Patient not on oral corticosteroids      | To be started             | Asia (n = 44)              | 32 ( 59.26 % )                    | 11 ( 20.37 % )                 | 1 ( 1.85 % )                      | 1 ( 1.85 % )                     |
|                             |                                          |                           | Africa (n = 3)             | 1 ( 1.85 % )                      | 1 ( 1.85 % )                   | 0                                 | 0                                |
|                             |                                          |                           | Europe (n = 43)            | 30 ( 55.56 % )                    | 14 ( 25.93 % )                 | 4 ( 7.41 % )                      | 3 ( 5.56 % )                     |
|                             |                                          |                           | North America (n = 34)     | 27 ( 50 % )                       | 12 ( 22.22 % )                 | 2 ( 3.7 % )                       | 1 ( 1.85 % )                     |
|                             |                                          |                           | South America (n =7)       | 3 ( 5.56 % )                      | 1 ( 1.85 % )                   | 0                                 | 0                                |
|                             |                                          |                           | Oceania (n = 8)            | 5 ( 9.26 % )                      | 4 ( 7.41 % )                   | 0                                 | 0                                |
|                             | Patient on low dose oral corticosteroids | To be maintained          | Asia (n = 44)              | 40 ( 74.07 % )                    | 18 ( 33.33 % )                 | 4 ( 7.41 % )                      | 2 ( 3.7 % )                      |
|                             |                                          |                           | Africa (n = 3)             | 3 ( 5.56 % )                      | 2 ( 3.7 % )                    | 1 ( 1.85 % )                      | 1 ( 1.85 % )                     |
|                             |                                          |                           | Europe (n = 43)            | 43 ( 79.63 % )                    | 29 ( 53.7 % )                  | 18 ( 33.33 % )                    | 16 ( 29.63 % )                   |
|                             |                                          |                           | North America (n = 34)     | 30 ( 55.56 % )                    | 20 ( 37.04 % )                 | 11 ( 20.37 % )                    | 8 ( 14.81 % )                    |
|                             |                                          |                           | South America (n =7)       | 7 ( 12.96 % )                     | 3 ( 5.56 % )                   | 0                                 | 0                                |
|                             |                                          |                           | Oceania (n = 8)            | 6 ( 11.11 % )                     | 5 ( 9.26 % )                   | 2 ( 3.7 % )                       | 1 ( 1.85 % )                     |
|                             | Patient on low dose oral corticosteroids | To be decreased           | Asia (n = 44)              | 9 ( 16.67 % )                     | 30 ( 55.56 % )                 | 39 ( 72.22 % )                    | 41 ( 75.93 % )                   |
|                             |                                          |                           | Africa (n = 3)             | 0                                 | 2 ( 3.7 % )                    | 2 ( 3.7 % )                       | 2 ( 3.7 % )                      |
|                             |                                          |                           | Europe (n = 43)            | 4 ( 7.41 % )                      | 19 ( 35.19 % )                 | 22 ( 40.74 % )                    | 25 ( 46.3 % )                    |
|                             |                                          |                           | North America (n = 34)     | 6 ( 11.11 % )                     | 15 ( 27.78 % )                 | 26 ( 48.15 % )                    | 29 ( 53.7 % )                    |
|                             |                                          |                           | South America (n =7)       | 1 ( 1.85 % )                      | 4 ( 7.41 % )                   | 7 ( 12.96 % )                     | 7 ( 12.96 % )                    |
|                             |                                          |                           | Oceania (n = 8)            | 2 ( 3.7 % )                       | 5 ( 9.26 % )                   | 7 ( 12.96 % )                     | 7 ( 12.96 % )                    |
|                             | Patient on low dose oral corticosteroids | To be tapered and stopped | Asia (n = 44)              | 8 ( 14.81 % )                     | 27 ( 50 % )                    | 39 ( 72.22 % )                    | 41 ( 75.93 % )                   |
|                             |                                          |                           | Africa (n = 3)             | 0                                 | 0                              | 2 ( 3.7 % )                       | 2 ( 3.7 % )                      |
|                             |                                          |                           | Europe (n = 43)            | 2 ( 3.7 % )                       | 14 ( 25.93 % )                 | 23 ( 42.59 % )                    | 24 ( 44.44 % )                   |
|                             |                                          |                           | North America (n = 34)     | 3 ( 5.56 % )                      | 14 ( 25.93 % )                 | 21 ( 38.89 % )                    | 25 ( 46.3 % )                    |
|                             |                                          |                           | South America (n =7)       | 1 ( 1.85 % )                      | 3 ( 5.56 % )                   | 6 ( 11.11 % )                     | 6 ( 11.11 % )                    |
|                             |                                          |                           | Oceania (n = 8)            | 2 ( 3.7 % )                       | 4 ( 7.41 % )                   | 7 ( 12.96 % )                     | 7 ( 12.96 % )                    |
|                             | Patient on higher dose                   | To be maintained          | Asia (n = 44)              | 25 ( 46.3 % )                     | 12 ( 22.22 % )                 | 4 ( 7.41 % )                      | 2 ( 3.7 % )                      |

|                        |                                     |                                     |                        |                 |                |                |                |               |
|------------------------|-------------------------------------|-------------------------------------|------------------------|-----------------|----------------|----------------|----------------|---------------|
|                        | oral corticosteroids                |                                     | Africa (n = 3)         | 2 ( 3.7 % )     | 1 ( 1.85 % )   | 0              | 0              |               |
|                        |                                     |                                     | Europe (n = 43)        | 32 ( 59.26 % )  | 19 ( 35.19 % ) | 8 ( 14.81 % )  | 3 ( 5.56 % )   |               |
|                        |                                     |                                     | North America (n = 34) | 20 ( 37.04 % )  | 8 ( 14.81 % )  | 4 ( 7.41 % )   | 5 ( 9.26 % )   |               |
|                        |                                     |                                     | South America (n =7)   | 3 ( 5.56 % )    | 1 ( 1.85 % )   | 0              | 0              |               |
|                        |                                     |                                     | Oceania (n = 8)        | 4 ( 7.41 % )    | 2 ( 3.7 % )    | 1 ( 1.85 % )   | 0              |               |
|                        |                                     | To be decreased                     | Asia (n = 44)          | 24 ( 44.44 % )  | 35 ( 64.81 % ) | 41 ( 75.93 % ) | 42 ( 77.78 % ) |               |
|                        |                                     |                                     | Africa (n = 3)         | 2 ( 3.7 % )     | 1 ( 1.85 % )   | 2 ( 3.7 % )    | 2 ( 3.7 % )    |               |
|                        |                                     |                                     | Europe (n = 43)        | 18 ( 33.33 % )  | 26 ( 48.15 % ) | 35 ( 64.81 % ) | 37 ( 68.52 % ) |               |
|                        |                                     |                                     | North America (n = 34) | 11 ( 20.37 % )  | 21 ( 38.89 % ) | 30 ( 55.56 % ) | 32 ( 59.26 % ) |               |
|                        |                                     |                                     | South America (n =7)   | 4 ( 7.41 % )    | 7 ( 12.96 % )  | 7 ( 12.96 % )  | 7 ( 12.96 % )  |               |
|                        |                                     | To be tapered and stopped           | Oceania (n = 8)        | 4 ( 7.41 % )    | 6 ( 11.11 % )  | 8 ( 14.81 % )  | 8 ( 14.81 % )  |               |
|                        |                                     |                                     | Asia (n = 44)          | 16 ( 29.63 % )  | 30 ( 55.56 % ) | 40 ( 74.07 % ) | 41 ( 75.93 % ) |               |
|                        | Africa (n = 3)                      |                                     | 0                      | 1 ( 1.85 % )    | 3 ( 5.56 % )   | 3 ( 5.56 % )   |                |               |
|                        | Europe (n = 43)                     |                                     | 8 ( 14.81 % )          | 14 ( 25.93 % )  | 27 ( 50 % )    | 31 ( 57.41 % ) |                |               |
|                        | North America (n = 34)              |                                     | 4 ( 7.41 % )           | 16 ( 29.63 % )  | 26 ( 48.15 % ) | 28 ( 51.85 % ) |                |               |
|                        | South America (n =7)                |                                     | 2 ( 3.7 % )            | 4 ( 7.41 % )    | 7 ( 12.96 % )  | 7 ( 12.96 % )  |                |               |
|                        | IV METHYL PREDNISOLONE              |                                     | To be started          | Oceania (n = 8) | 4 ( 7.41 % )   | 5 ( 9.26 % )   | 7 ( 12.96 % )  | 8 ( 14.81 % ) |
|                        |                                     |                                     |                        | Asia (n = 44)   | 23 ( 42.59 % ) | 7 ( 12.96 % )  | 1 ( 1.85 % )   | 1 ( 1.85 % )  |
| Africa (n = 3)         |                                     |                                     |                        | 1 ( 1.85 % )    | 0              | 0              | 0              |               |
| Europe (n = 43)        |                                     |                                     |                        | 21 ( 38.89 % )  | 6 ( 11.11 % )  | 4 ( 7.41 % )   | 3 ( 5.56 % )   |               |
| North America (n = 34) |                                     |                                     |                        | 22 ( 40.74 % )  | 11 ( 20.37 % ) | 1 ( 1.85 % )   | 1 ( 1.85 % )   |               |
| South America (n =7)   |                                     |                                     |                        | 2 ( 3.7 % )     | 0              | 1 ( 1.85 % )   | 1 ( 1.85 % )   |               |
| LOCAL CORTICOSTEROIDS  | Patient not on oral corticosteroids | To be preferred to systemic therapy | Oceania (n = 8)        | 4 ( 7.41 % )    | 1 ( 1.85 % )   | 0              | 0              |               |
|                        |                                     |                                     | Asia (n = 44)          | 31 ( 57.41 % )  | 37 ( 68.52 % ) | 36 ( 66.67 % ) | 34 ( 62.96 % ) |               |
|                        |                                     |                                     | Africa (n = 3)         | 3 ( 5.56 % )    | 3 ( 5.56 % )   | 3 ( 5.56 % )   | 3 ( 5.56 % )   |               |
|                        |                                     |                                     | Europe (n = 43)        | 32 ( 59.26 % )  | 41 ( 75.93 % ) | 40 ( 74.07 % ) | 41 ( 75.93 % ) |               |
|                        |                                     |                                     | North America (n = 34) | 26 ( 48.15 % )  | 27 ( 50 % )    | 30 ( 55.56 % ) | 30 ( 55.56 % ) |               |
|                        |                                     |                                     | South America (n =7)   | 4 ( 7.41 % )    | 6 ( 11.11 % )  | 6 ( 11.11 % )  | 6 ( 11.11 % )  |               |

|                         |                                          |                                                |                |                |                |                |                |
|-------------------------|------------------------------------------|------------------------------------------------|----------------|----------------|----------------|----------------|----------------|
|                         | Patient on low dose oral corticosteroids | To be preferred to increasing systemic therapy | Asia (n = 44)  | 33 ( 61.11 % ) | 37 ( 68.52 % ) | 40 ( 74.07 % ) | 37 ( 68.52 % ) |
| Africa (n = 3)          |                                          |                                                | 3 ( 5.56 % )   | 3 ( 5.56 % )   | 3 ( 5.56 % )   | 3 ( 5.56 % )   |                |
| Europe (n = 43)         |                                          |                                                | 33 ( 61.11 % ) | 38 ( 70.37 % ) | 40 ( 74.07 % ) | 40 ( 74.07 % ) |                |
| North America (n = 34)  |                                          |                                                | 28 ( 51.85 % ) | 30 ( 55.56 % ) | 29 ( 53.7 % )  | 28 ( 51.85 % ) |                |
| South America (n =7)    |                                          |                                                | 4 ( 7.41 % )   | 6 ( 11.11 % )  | 6 ( 11.11 % )  | 6 ( 11.11 % )  |                |
| Oceania (n = 8)         |                                          |                                                | 5 ( 9.26 % )   | 7 ( 12.96 % )  | 8 ( 14.81 % )  | 8 ( 14.81 % )  |                |
| <b>CONVENTIONAL IMT</b> | To be started                            | Asia (n = 44)                                  | 32 ( 59.26 % ) | 12 ( 22.22 % ) | 3 ( 5.56 % )   | 1 ( 1.85 % )   |                |
|                         |                                          | Africa (n = 3)                                 | 1 ( 1.85 % )   | 0              | 0              | 0              |                |
|                         |                                          | Europe (n = 43)                                | 19 ( 35.19 % ) | 8 ( 14.81 % )  | 2 ( 3.7 % )    | 2 ( 3.7 % )    |                |
|                         |                                          | North America (n = 34)                         | 21 ( 38.89 % ) | 11 ( 20.37 % ) | 2 ( 3.7 % )    | 0              |                |
|                         |                                          | South America (n =7)                           | 3 ( 5.56 % )   | 1 ( 1.85 % )   | 0              | 0              |                |
|                         |                                          | Oceania (n = 8)                                | 6 ( 11.11 % )  | 4 ( 7.41 % )   | 0              | 0              |                |
|                         | To be maintained                         | Asia (n = 44)                                  | 36 ( 66.67 % ) | 17 ( 31.48 % ) | 5 ( 9.26 % )   | 2 ( 3.7 % )    |                |
|                         |                                          | Africa (n = 3)                                 | 3 ( 5.56 % )   | 1 ( 1.85 % )   | 1 ( 1.85 % )   | 1 ( 1.85 % )   |                |
|                         |                                          | Europe (n = 43)                                | 41 ( 75.93 % ) | 28 ( 51.85 % ) | 7 ( 12.96 % )  | 3 ( 5.56 % )   |                |
|                         |                                          | North America (n = 34)                         | 32 ( 59.26 % ) | 19 ( 35.19 % ) | 4 ( 7.41 % )   | 4 ( 7.41 % )   |                |
|                         |                                          | South America (n =7)                           | 6 ( 11.11 % )  | 1 ( 1.85 % )   | 0              | 0              |                |
|                         |                                          | Oceania (n = 8)                                | 7 ( 12.96 % )  | 6 ( 11.11 % )  | 1 ( 1.85 % )   | 1 ( 1.85 % )   |                |
|                         | To be decreased                          | Asia (n = 44)                                  | 9 ( 16.67 % )  | 27 ( 50 % )    | 40 ( 74.07 % ) | 41 ( 75.93 % ) |                |
|                         |                                          | Africa (n = 3)                                 | 0              | 2 ( 3.7 % )    | 3 ( 5.56 % )   | 3 ( 5.56 % )   |                |
|                         |                                          | Europe (n = 43)                                | 4 ( 7.41 % )   | 16 ( 29.63 % ) | 30 ( 55.56 % ) | 33 ( 61.11 % ) |                |
|                         |                                          | North America (n = 34)                         | 4 ( 7.41 % )   | 17 ( 31.48 % ) | 29 ( 53.7 % )  | 29 ( 53.7 % )  |                |
|                         |                                          | South America (n =7)                           | 1 ( 1.85 % )   | 7 ( 12.96 % )  | 7 ( 12.96 % )  | 7 ( 12.96 % )  |                |
|                         |                                          | Oceania (n = 8)                                | 0              | 2 ( 3.7 % )    | 7 ( 12.96 % )  | 8 ( 14.81 % )  |                |
|                         | To be stopped                            | Asia (n = 44)                                  | 6 ( 11.11 % )  | 21 ( 38.89 % ) | 37 ( 68.52 % ) | 41 ( 75.93 % ) |                |
|                         |                                          | Africa (n = 3)                                 | 0              | 0              | 3 ( 5.56 % )   | 3 ( 5.56 % )   |                |
|                         |                                          | Europe (n = 43)                                | 3 ( 5.56 % )   | 11 ( 20.37 % ) | 34 ( 62.96 % ) | 35 ( 64.81 % ) |                |
|                         |                                          | North America (n = 34)                         | 3 ( 5.56 % )   | 13 ( 24.07 % ) | 24 ( 44.44 % ) | 29 ( 53.7 % )  |                |
|                         |                                          | South America (n =7)                           | 0              | 2 ( 3.7 % )    | 7 ( 12.96 % )  | 7 ( 12.96 % )  |                |

|                    |                 |                        |                |                |                |                |
|--------------------|-----------------|------------------------|----------------|----------------|----------------|----------------|
|                    |                 | Oceania (n = 8)        | 0              | 2 ( 3.7 % )    | 7 ( 12.96 % )  | 8 ( 14.81 % )  |
| <b>BIOLOGICS</b>   | To be started   | Asia (n = 44)          | 25 ( 46.3 % )  | 5 ( 9.26 % )   | 1 ( 1.85 % )   | 1 ( 1.85 % )   |
|                    |                 | Africa (n = 3)         | 1 ( 1.85 % )   | 0              | 0              | 0              |
|                    |                 | Europe (n = 43)        | 16 ( 29.63 % ) | 6 ( 11.11 % )  | 3 ( 5.56 % )   | 3 ( 5.56 % )   |
|                    |                 | North America (n = 34) | 20 ( 37.04 % ) | 9 ( 16.67 % )  | 2 ( 3.7 % )    | 2 ( 3.7 % )    |
|                    |                 | South America (n =7)   | 2 ( 3.7 % )    | 0              | 0              | 0              |
|                    |                 | Oceania (n = 8)        | 5 ( 9.26 % )   | 3 ( 5.56 % )   | 0              | 0              |
|                    | To be continued | Asia (n = 44)          | 35 ( 64.81 % ) | 15 ( 27.78 % ) | 4 ( 7.41 % )   | 1 ( 1.85 % )   |
|                    |                 | Africa (n = 3)         | 2 ( 3.7 % )    | 1 ( 1.85 % )   | 0              | 0              |
|                    |                 | Europe (n = 43)        | 43 ( 79.63 % ) | 31 ( 57.41 % ) | 7 ( 12.96 % )  | 4 ( 7.41 % )   |
|                    |                 | North America (n = 34) | 29 ( 53.7 % )  | 18 ( 33.33 % ) | 6 ( 11.11 % )  | 4 ( 7.41 % )   |
|                    |                 | South America (n =7)   | 6 ( 11.11 % )  | 2 ( 3.7 % )    | 0              | 0              |
|                    |                 | Oceania (n = 8)        | 8 ( 14.81 % )  | 6 ( 11.11 % )  | 1 ( 1.85 % )   | 1 ( 1.85 % )   |
|                    | To be stopped   | Asia (n = 44)          | 10 ( 18.52 % ) | 29 ( 53.7 % )  | 38 ( 70.37 % ) | 41 ( 75.93 % ) |
|                    |                 | Africa (n = 3)         | 1 ( 1.85 % )   | 2 ( 3.7 % )    | 3 ( 5.56 % )   | 3 ( 5.56 % )   |
|                    |                 | Europe (n = 43)        | 2 ( 3.7 % )    | 9 ( 16.67 % )  | 33 ( 61.11 % ) | 37 ( 68.52 % ) |
|                    |                 | North America (n = 34) | 4 ( 7.41 % )   | 16 ( 29.63 % ) | 28 ( 51.85 % ) | 28 ( 51.85 % ) |
|                    |                 | South America (n =7)   | 0              | 4 ( 7.41 % )   | 7 ( 12.96 % )  | 7 ( 12.96 % )  |
|                    |                 | Oceania (n = 8)        | 0              | 3 ( 5.56 % )   | 7 ( 12.96 % )  | 7 ( 12.96 % )  |
| <b>TOCILIZUMAB</b> | To be started   | Asia (n = 44)          | 26 ( 48.15 % ) | 17 ( 31.48 % ) | 12 ( 22.22 % ) | 11 ( 20.37 % ) |
|                    |                 | Africa (n = 3)         | 1 ( 1.85 % )   | 1 ( 1.85 % )   | 1 ( 1.85 % )   | 1 ( 1.85 % )   |
|                    |                 | Europe (n = 43)        | 25 ( 46.3 % )  | 18 ( 33.33 % ) | 15 ( 27.78 % ) | 16 ( 29.63 % ) |
|                    |                 | North America (n = 34) | 26 ( 48.15 % ) | 17 ( 31.48 % ) | 9 ( 16.67 % )  | 9 ( 16.67 % )  |
|                    |                 | South America (n =7)   | 3 ( 5.56 % )   | 0              | 1 ( 1.85 % )   | 1 ( 1.85 % )   |
|                    |                 | Oceania (n = 8)        | 4 ( 7.41 % )   | 4 ( 7.41 % )   | 1 ( 1.85 % )   | 2 ( 3.7 % )    |
|                    | To be continued | Asia (n = 44)          | 37 ( 68.52 % ) | 26 ( 48.15 % ) | 17 ( 31.48 % ) | 15 ( 27.78 % ) |
|                    |                 | Africa (n = 3)         | 3 ( 5.56 % )   | 1 ( 1.85 % )   | 1 ( 1.85 % )   | 1 ( 1.85 % )   |
|                    |                 | Europe (n = 43)        | 42 ( 77.78 % ) | 37 ( 68.52 % ) | 26 ( 48.15 % ) | 26 ( 48.15 % ) |
|                    |                 | North America (n = 34) | 32 ( 59.26 % ) | 24 ( 44.44 % ) | 17 ( 31.48 % ) | 15 ( 27.78 % ) |

|  |              |                        |                |                |                |                |
|--|--------------|------------------------|----------------|----------------|----------------|----------------|
|  |              | South America (n =7)   | 7 ( 12.96 % )  | 4 ( 7.41 % )   | 2 ( 3.7 % )    | 2 ( 3.7 % )    |
|  |              | Oceania (n = 8)        | 7 ( 12.96 % )  | 6 ( 11.11 % )  | 3 ( 5.56 % )   | 3 ( 5.56 % )   |
|  | To switch to | Asia (n = 44)          | 19 ( 35.19 % ) | 14 ( 25.93 % ) | 15 ( 27.78 % ) | 14 ( 25.93 % ) |
|  |              | Africa (n = 3)         | 0              | 0              | 0              | 0              |
|  |              | Europe (n = 43)        | 7 ( 12.96 % )  | 7 ( 12.96 % )  | 12 ( 22.22 % ) | 16 ( 29.63 % ) |
|  |              | North America (n = 34) | 11 ( 20.37 % ) | 7 ( 12.96 % )  | 10 ( 18.52 % ) | 10 ( 18.52 % ) |
|  |              | South America (n =7)   | 3 ( 5.56 % )   | 2 ( 3.7 % )    | 2 ( 3.7 % )    | 2 ( 3.7 % )    |
|  |              | Oceania (n = 8)        | 4 ( 7.41 % )   | 2 ( 3.7 % )    | 2 ( 3.7 % )    | 3 ( 5.56 % )   |

**Consensus for “No”**

**Consensus for “Yes”**

\*High risk category: patients with uveitis or rheumatologic disease with one of the following risk factors: use of biologics; high doses or multiple immunosuppressives; active systemic disease associated with uveitis; presence of other co-morbidities or multisystem disease including heart, lung and/or renal involvement; neutropenia; smoking; pregnancy; older age; previous history of infection while on IMT
