# Supplementary material
Source: PubMed Central journal article supplement (PMC7313529)
Supplement: bjophthalmol-2020-316776s005.pdf [file bjophthalmol-2020-316776s005.pdf]

**Table 3A:** Consensus guidelines on immunomodulatory therapy in times of COVID-19 in **very high risk** patients – As per **years of experience** and **uveitis patients per year**

|                             |                                              |                                | Uveitis specialists' expertise |                | Healthy patient – without contact | Healthy patient – with contact | Sick patient – COVID-19 suspected | Sick patient – COVID-19 positive |
|-----------------------------|----------------------------------------------|--------------------------------|--------------------------------|----------------|-----------------------------------|--------------------------------|-----------------------------------|----------------------------------|
| <b>ORAL CORTICOSTEROIDS</b> | Patients not on oral corticosteroids         | To be started                  | Years of experience in uveitis | ≤ 15 (n = 80)  | 44 ( 55 %)                        | 22 ( 27.5 %)                   | 8 ( 10 %)                         | 8 ( 10 %)                        |
|                             |                                              |                                |                                | > 15 (n = 59)  | 36 ( 61.02 %)                     | 18 ( 30.51 %)                  | 4 ( 6.78 %)                       | 1 ( 1.69 %)                      |
|                             |                                              |                                | Uveitis patients on IMT/year   | < 300 (n = 85) | 49 ( 57.65 %)                     | 27 ( 31.76 %)                  | 9 ( 10.59 %)                      | 7 ( 8.24 %)                      |
|                             |                                              |                                |                                | ≥ 300 (n =54)  | 31 ( 57.41 %)                     | 13 ( 24.07 %)                  | 3 ( 5.56 %)                       | 2 ( 3.7 %)                       |
|                             | Patients on low dose oral corticosteroids    | To be maintained               | Years of experience in uveitis | ≤ 15 (n = 80)  | 62 ( 77.5 %)                      | 36 ( 45 %)                     | 13 ( 16.25 %)                     | 12 ( 15 %)                       |
|                             |                                              |                                |                                | > 15 (n = 59)  | 50 ( 84.75 %)                     | 30 ( 50.85 %)                  | 18 ( 30.51 %)                     | 15 ( 25.42 %)                    |
|                             |                                              |                                | Uveitis patients on IMT/year   | < 300 (n = 85) | 70 ( 82.35 %)                     | 40 ( 47.06 %)                  | 17 ( 20 %)                        | 14 ( 16.47 %)                    |
|                             |                                              |                                |                                | ≥ 300 (n =54)  | 42 ( 77.78 %)                     | 26 ( 48.15 %)                  | 14 ( 25.93 %)                     | 13 ( 24.07 %)                    |
|                             |                                              | To be decreased                | Years of experience in uveitis | ≤ 15 (n = 80)  | 31 ( 38.75 %)                     | 51 ( 63.75 %)                  | 64 ( 80 %)                        | 65 ( 81.25 %)                    |
|                             |                                              |                                |                                | > 15 (n = 59)  | 12 ( 20.34 %)                     | 33 ( 55.93 %)                  | 41 ( 69.49 %)                     | 45 ( 76.27 %)                    |
|                             |                                              |                                | Uveitis patients on IMT/year   | < 300 (n = 85) | 24 ( 28.24 %)                     | 49 ( 57.65 %)                  | 64 ( 75.29 %)                     | 66 ( 77.65 %)                    |
|                             |                                              |                                |                                | ≥ 300 (n =54)  | 19 ( 35.19 %)                     | 35 ( 64.81 %)                  | 41 ( 75.93 %)                     | 44 ( 81.48 %)                    |
|                             |                                              | To be tapered and stopped      | Years of experience in uveitis | ≤ 15 (n = 80)  | 24 ( 30 %)                        | 48 ( 60 %)                     | 63 ( 78.75 %)                     | 65 ( 81.25 %)                    |
|                             |                                              |                                |                                | > 15 (n = 59)  | 9 ( 15.25 %)                      | 25 ( 42.37 %)                  | 39 ( 66.1 %)                      | 42 ( 71.19 %)                    |
|                             |                                              |                                | Uveitis patients on IMT/year   | < 300 (n = 85) | 19 ( 22.35 %)                     | 45 ( 52.94 %)                  | 65 ( 76.47 %)                     | 69 ( 81.18 %)                    |
|                             |                                              |                                |                                | ≥ 300 (n =54)  | 14 ( 25.93 %)                     | 28 ( 51.85 %)                  | 37 ( 68.52 %)                     | 38 ( 70.37 %)                    |
|                             | Patients on higher dose oral corticosteroids | To be maintained               | Years of experience in uveitis | ≤ 15 (n = 80)  | 37 ( 46.25 %)                     | 19 ( 23.75 %)                  | 5 ( 6.25 %)                       | 4 ( 5 %)                         |
|                             |                                              |                                |                                | > 15 (n = 59)  | 37 ( 62.71 %)                     | 16 ( 27.12 %)                  | 4 ( 6.78 %)                       | 3 ( 5.08 %)                      |
|                             |                                              |                                | Uveitis patients on IMT/year   | < 300 (n = 85) | 49 ( 57.65 %)                     | 24 ( 28.24 %)                  | 4 ( 4.71 %)                       | 3 ( 3.53 %)                      |
|                             |                                              |                                |                                | ≥ 300 (n =54)  | 25 ( 46.3 %)                      | 11 ( 20.37 %)                  | 5 ( 9.26 %)                       | 4 ( 7.41 %)                      |
|                             |                                              | To be decreased                | Years of experience in uveitis | ≤ 15 (n = 80)  | 46 ( 57.5 %)                      | 57 ( 71.25 %)                  | 70 ( 87.5 %)                      | 70 ( 87.5 %)                     |
|                             |                                              |                                |                                | > 15 (n = 59)  | 26 ( 44.07 %)                     | 41 ( 69.49 %)                  | 54 ( 91.53 %)                     | 56 ( 94.92 %)                    |
|                             |                                              |                                | Uveitis patients on IMT/year   | < 300 (n = 85) | 40 ( 47.06 %)                     | 55 ( 64.71 %)                  | 75 ( 88.24 %)                     | 75 ( 88.24 %)                    |
|                             |                                              |                                |                                | ≥ 300 (n =54)  | 32 ( 59.26 %)                     | 43 ( 79.63 %)                  | 49 ( 90.74 %)                     | 51 ( 94.44 %)                    |
| To be tapered and stopped   |                                              | Years of experience in uveitis | ≤ 15 (n = 80)                  | 30 ( 37.5 %)   | 51 ( 63.75 %)                     | 64 ( 80 %)                     | 68 ( 85 %)                        |                                  |
|                             |                                              |                                | > 15 (n = 59)                  | 13 ( 22.03 %)  | 29 ( 49.15 %)                     | 44 ( 74.58 %)                  | 47 ( 79.66 %)                     |                                  |

|                               |                                           |                                                |                                |                |               |               |               |               |
|-------------------------------|-------------------------------------------|------------------------------------------------|--------------------------------|----------------|---------------|---------------|---------------|---------------|
|                               |                                           |                                                | Uveitis patients on IMT/year   | < 300 (n = 85) | 24 ( 28.24 %) | 48 ( 56.47 %) | 67 ( 78.82 %) | 73 ( 85.88 %) |
|                               |                                           |                                                |                                | ≥ 300 (n =54)  | 19 ( 35.19 %) | 32 ( 59.26 %) | 41 ( 75.93 %) | 42 ( 77.78 %) |
| <b>IV METHYL PREDNISOLONE</b> |                                           | To be started                                  | Years of experience in uveitis | ≤ 15 (n = 80)  | 32 ( 40 %)    | 15 ( 18.75 %) | 6 ( 7.5 %)    | 3 ( 3.75 %)   |
|                               |                                           |                                                |                                | > 15 (n = 59)  | 25 ( 42.37 %) | 9 ( 15.25 %)  | 3 ( 5.08 %)   | 2 ( 3.39 %)   |
|                               |                                           |                                                | Uveitis patients on IMT/year   | < 300 (n = 85) | 34 ( 40 %)    | 14 ( 16.47 %) | 5 ( 5.88 %)   | 2 ( 2.35 %)   |
|                               |                                           |                                                |                                | ≥ 300 (n =54)  | 23 ( 42.59 %) | 10 ( 18.52 %) | 4 ( 7.41 %)   | 3 ( 5.56 %)   |
| <b>LOCAL CORTICOSTEROIDS</b>  | Patients not on oral corticosteroids      | To be preferred to systemic therapy            | Years of experience in uveitis | ≤ 15 (n = 80)  | 62 ( 77.5 %)  | 69 ( 86.25 %) | 69 ( 86.25 %) | 69 ( 86.25 %) |
|                               |                                           |                                                |                                | > 15 (n = 59)  | 44 ( 74.58 %) | 52 ( 88.14 %) | 54 ( 91.53 %) | 52 ( 88.14 %) |
|                               |                                           |                                                | Uveitis patients on IMT/year   | < 300 (n = 85) | 68 ( 80 %)    | 74 ( 87.06 %) | 71 ( 83.53 %) | 70 ( 82.35 %) |
|                               |                                           |                                                |                                | ≥ 300 (n =54)  | 38 ( 70.37 %) | 47 ( 87.04 %) | 52 ( 96.3 %)  | 51 ( 94.44 %) |
|                               | Patients on low dose oral corticosteroids | To be preferred to increasing systemic therapy | Years of experience in uveitis | ≤ 15 (n = 80)  | 67 ( 83.75 %) | 74 ( 92.5 %)  | 72 ( 90 %)    | 71 ( 88.75 %) |
|                               |                                           |                                                |                                | > 15 (n = 59)  | 46 ( 77.97 %) | 53 ( 89.83 %) | 54 ( 91.53 %) | 53 ( 89.83 %) |
|                               |                                           |                                                | Uveitis patients on IMT/year   | < 300 (n = 85) | 73 ( 85.88 %) | 78 ( 91.76 %) | 75 ( 88.24 %) | 74 ( 87.06 %) |
|                               |                                           |                                                |                                | ≥ 300 (n =54)  | 40 ( 74.07 %) | 49 ( 90.74 %) | 51 ( 94.44 %) | 50 ( 92.59 %) |
| <b>CONVENTIONAL IMT</b>       | To be started                             | Years of experience in uveitis                 | ≤ 15 (n = 80)                  | 42 ( 52.5 %)   | 13 ( 16.25 %) | 3 ( 3.75 %)   | 2 ( 2.5 %)    |               |
|                               |                                           |                                                | > 15 (n = 59)                  | 36 ( 61.02 %)  | 17 ( 28.81 %) | 2 ( 3.39 %)   | 0 ( 0 %)      |               |
|                               |                                           |                                                | Uveitis patients on IMT/year   | < 300 (n = 85) | 49 ( 57.65 %) | 17 ( 20 %)    | 4 ( 4.71 %)   | 2 ( 2.35 %)   |
|                               |                                           |                                                |                                | ≥ 300 (n =54)  | 29 ( 53.7 %)  | 13 ( 24.07 %) | 1 ( 1.85 %)   | 0 ( 0 %)      |
|                               |                                           | To be maintained                               | Years of experience in uveitis | ≤ 15 (n = 80)  | 62 ( 77.5 %)  | 34 ( 42.5 %)  | 13 ( 16.25 %) | 8 ( 10 %)     |
|                               |                                           |                                                |                                | > 15 (n = 59)  | 49 ( 83.05 %) | 26 ( 44.07 %) | 8 ( 13.56 %)  | 4 ( 6.78 %)   |
|                               |                                           |                                                | Uveitis patients on IMT/year   | < 300 (n = 85) | 68 ( 80 %)    | 35 ( 41.18 %) | 15 ( 17.65 %) | 8 ( 9.41 %)   |
|                               |                                           |                                                |                                | ≥ 300 (n =54)  | 43 ( 79.63 %) | 25 ( 46.3 %)  | 6 ( 11.11 %)  | 4 ( 7.41 %)   |
|                               | To be decreased                           | Years of experience in uveitis                 | ≤ 15 (n = 80)                  | 25 ( 31.25 %)  | 47 ( 58.75 %) | 66 ( 82.5 %)  | 71 ( 88.75 %) |               |
|                               |                                           |                                                | > 15 (n = 59)                  | 16 ( 27.12 %)  | 37 ( 62.71 %) | 52 ( 88.14 %) | 55 ( 93.22 %) |               |
|                               |                                           | Uveitis patients on IMT/year                   | < 300 (n = 85)                 | 23 ( 27.06 %)  | 50 ( 58.82 %) | 71 ( 83.53 %) | 77 ( 90.59 %) |               |
|                               |                                           |                                                | ≥ 300 (n =54)                  | 18 ( 33.33 %)  | 34 ( 62.96 %) | 47 ( 87.04 %) | 49 ( 90.74 %) |               |
|                               | To be stopped                             | Years of experience in uveitis                 | ≤ 15 (n = 80)                  | 14 ( 17.5 %)   | 34 ( 42.5 %)  | 66 ( 82.5 %)  | 70 ( 87.5 %)  |               |
|                               |                                           |                                                | > 15 (n = 59)                  | 11 ( 18.64 %)  | 25 ( 42.37 %) | 50 ( 84.75 %) | 55 ( 93.22 %) |               |
|                               |                                           | Uveitis patients on IMT/year                   | < 300 (n = 85)                 | 16 ( 18.82 %)  | 35 ( 41.18 %) | 68 ( 80 %)    | 76 ( 89.41 %) |               |
|                               |                                           |                                                | ≥ 300 (n =54)                  | 9 ( 16.67 %)   | 24 ( 44.44 %) | 48 ( 88.89 %) | 49 ( 90.74 %) |               |

|                    |                 |                                |                |               |               |               |               |
|--------------------|-----------------|--------------------------------|----------------|---------------|---------------|---------------|---------------|
| <b>BIOLOGICS</b>   | To be started   | Years of experience in uveitis | ≤ 15 (n = 80)  | 31 ( 38.75 %) | 13 ( 16.25 %) | 8 ( 10 %)     | 7 ( 8.75 %)   |
|                    |                 |                                | > 15 (n = 59)  | 33 ( 55.93 %) | 13 ( 22.03 %) | 3 ( 5.08 %)   | 1 ( 1.69 %)   |
|                    |                 | Uveitis patients on IMT/year   | < 300 (n = 85) | 38 ( 44.71 %) | 14 ( 16.47 %) | 9 ( 10.59 %)  | 8 ( 9.41 %)   |
|                    |                 |                                | ≥ 300 (n =54)  | 26 ( 48.15 %) | 12 ( 22.22 %) | 2 ( 3.7 %)    | 0 ( 0 %)      |
|                    | To be continued | Years of experience in uveitis | ≤ 15 (n = 80)  | 61 ( 76.25 %) | 34 ( 42.5 %)  | 11 ( 13.75 %) | 8 ( 10 %)     |
|                    |                 |                                | > 15 (n = 59)  | 48 ( 81.36 %) | 26 ( 44.07 %) | 6 ( 10.17 %)  | 3 ( 5.08 %)   |
|                    |                 | Uveitis patients on IMT/year   | < 300 (n = 85) | 64 ( 75.29 %) | 32 ( 37.65 %) | 13 ( 15.29 %) | 9 ( 10.59 %)  |
|                    |                 |                                | ≥ 300 (n =54)  | 45 ( 83.33 %) | 28 ( 51.85 %) | 4 ( 7.41 %)   | 2 ( 3.7 %)    |
|                    | To be stopped   | Years of experience in uveitis | ≤ 15 (n = 80)  | 18 ( 22.5 %)  | 42 ( 52.5 %)  | 68 ( 85 %)    | 70 ( 87.5 %)  |
|                    |                 |                                | > 15 (n = 59)  | 12 ( 20.34 %) | 32 ( 54.24 %) | 50 ( 84.75 %) | 54 ( 91.53 %) |
|                    |                 | Uveitis patients on IMT/year   | < 300 (n = 85) | 22 ( 25.88 %) | 50 ( 58.82 %) | 70 ( 82.35 %) | 75 ( 88.24 %) |
|                    |                 |                                | ≥ 300 (n =54)  | 8 ( 14.81 %)  | 24 ( 44.44 %) | 48 ( 88.89 %) | 49 ( 90.74 %) |
| <b>TOCILIZUMAB</b> | To be started   | Years of experience in uveitis | ≤ 15 (n = 80)  | 39 ( 48.75 %) | 25 ( 31.25 %) | 21 ( 26.25 %) | 22 ( 27.5 %)  |
|                    |                 |                                | > 15 (n = 59)  | 33 ( 55.93 %) | 21 ( 35.59 %) | 20 ( 33.9 %)  | 20 ( 33.9 %)  |
|                    |                 | Uveitis patients on IMT/year   | < 300 (n = 85) | 43 ( 50.59 %) | 26 ( 30.59 %) | 22 ( 25.88 %) | 23 ( 27.06 %) |
|                    |                 |                                | ≥ 300 (n =54)  | 29 ( 53.7 %)  | 20 ( 37.04 %) | 19 ( 35.19 %) | 19 ( 35.19 %) |
|                    | To be continued | Years of experience in uveitis | ≤ 15 (n = 80)  | 62 ( 77.5 %)  | 50 ( 62.5 %)  | 32 ( 40 %)    | 32 ( 40 %)    |
|                    |                 |                                | > 15 (n = 59)  | 53 ( 89.83 %) | 40 ( 67.8 %)  | 31 ( 52.54 %) | 30 ( 50.85 %) |
|                    |                 | Uveitis patients on IMT/year   | < 300 (n = 85) | 67 ( 78.82 %) | 51 ( 60 %)    | 39 ( 45.88 %) | 38 ( 44.71 %) |
|                    |                 |                                | ≥ 300 (n =54)  | 48 ( 88.89 %) | 39 ( 72.22 %) | 24 ( 44.44 %) | 24 ( 44.44 %) |
|                    | To switch to    | Years of experience in uveitis | ≤ 15 (n = 80)  | 27 ( 33.75 %) | 20 ( 25 %)    | 22 ( 27.5 %)  | 28 ( 35 %)    |
|                    |                 |                                | > 15 (n = 59)  | 20 ( 33.9 %)  | 18 ( 30.51 %) | 24 ( 40.68 %) | 24 ( 40.68 %) |
|                    |                 | Uveitis patients on IMT/year   | < 300 (n = 85) | 34 ( 40 %)    | 22 ( 25.88 %) | 26 ( 30.59 %) | 32 ( 37.65 %) |
|                    |                 |                                | ≥ 300 (n =54)  | 13 ( 24.07 %) | 16 ( 29.63 %) | 20 ( 37.04 %) | 20 ( 37.04 %) |

**Table 3B:** Consensus guidelines on immunomodulatory therapy in times of COVID-19 in **very high risk** patients – As per **geographical region**

|                             |                                           |                           | Experts' geographical area | Healthy patient – without contact | Healthy patient - with contact | Sick patient – COVID-19 suspected | Sick patient – COVID-19 positive |
|-----------------------------|-------------------------------------------|---------------------------|----------------------------|-----------------------------------|--------------------------------|-----------------------------------|----------------------------------|
| <b>ORAL CORTICOSTEROIDS</b> | Patients not on oral corticosteroids      | To be started             | Asia (n = 44)              | 24 ( 54.55 % )                    | 7 ( 15.91 % )                  | 2 ( 4.55 % )                      | 2 ( 4.55 % )                     |
|                             |                                           |                           | Africa (n = 3)             | 1 ( 33.33 % )                     | 1 ( 33.33 % )                  | 0                                 | 0                                |
|                             |                                           |                           | Europe (n = 43)            | 25 ( 58.14 % )                    | 13 ( 30.23 % )                 | 5 ( 11.63 % )                     | 3 ( 6.98 % )                     |
|                             |                                           |                           | North America (n = 34)     | 20 ( 58.82 % )                    | 14 ( 41.18 % )                 | 4 ( 11.76 % )                     | 4 ( 11.76 % )                    |
|                             |                                           |                           | South America (n =7)       | 4 ( 57.14 % )                     | 1 ( 14.29 % )                  | 0                                 | 0                                |
|                             |                                           |                           | Oceania (n = 8)            | 6 ( 75 % )                        | 4 ( 50 % )                     | 1 ( 12.5 % )                      | 0                                |
|                             | Patients on low dose oral corticosteroids | To be maintained          | Asia (n = 44)              | 33 ( 75 % )                       | 16 ( 36.36 % )                 | 5 ( 11.36 % )                     | 5 ( 11.36 % )                    |
|                             |                                           |                           | Africa (n = 3)             | 2 ( 66.67 % )                     | 1 ( 33.33 % )                  | 1 ( 33.33 % )                     | 1 ( 33.33 % )                    |
|                             |                                           |                           | Europe (n = 43)            | 38 ( 88.37 % )                    | 25 ( 58.14 % )                 | 14 ( 32.56 % )                    | 12 ( 27.91 % )                   |
|                             |                                           |                           | North America (n = 34)     | 28 ( 82.35 % )                    | 17 ( 50 % )                    | 8 ( 23.53 % )                     | 7 ( 20.59 % )                    |
|                             |                                           |                           | South America (n =7)       | 6 ( 85.71 % )                     | 3 ( 42.86 % )                  | 1 ( 14.29 % )                     | 1 ( 14.29 % )                    |
|                             |                                           |                           | Oceania (n = 8)            | 5 ( 62.5 % )                      | 4 ( 50 % )                     | 2 ( 25 % )                        | 1 ( 12.5 % )                     |
|                             |                                           | To be decreased           | Asia (n = 44)              | 21 ( 47.73 % )                    | 33 ( 75 % )                    | 39 ( 88.64 % )                    | 42 ( 95.45 % )                   |
|                             |                                           |                           | Africa (n = 3)             | 2 ( 66.67 % )                     | 3 ( 100 % )                    | 3 ( 100 % )                       | 3 ( 100 % )                      |
|                             |                                           |                           | Europe (n = 43)            | 9 ( 20.93 % )                     | 21 ( 48.84 % )                 | 25 ( 58.14 % )                    | 26 ( 60.47 % )                   |
|                             |                                           |                           | North America (n = 34)     | 7 ( 20.59 % )                     | 18 ( 52.94 % )                 | 25 ( 73.53 % )                    | 26 ( 76.47 % )                   |
|                             |                                           |                           | South America (n =7)       | 1 ( 14.29 % )                     | 5 ( 71.43 % )                  | 6 ( 85.71 % )                     | 6 ( 85.71 % )                    |
|                             |                                           |                           | Oceania (n = 8)            | 3 ( 37.5 % )                      | 4 ( 50 % )                     | 7 ( 87.5 % )                      | 7 ( 87.5 % )                     |
|                             |                                           | To be tapered and stopped | Asia (n = 44)              | 16 ( 36.36 % )                    | 30 ( 68.18 % )                 | 40 ( 90.91 % )                    | 40 ( 90.91 % )                   |
|                             |                                           |                           | Africa (n = 3)             | 1 ( 33.33 % )                     | 3 ( 100 % )                    | 3 ( 100 % )                       | 3 ( 100 % )                      |
|                             |                                           |                           | Europe (n = 43)            | 6 ( 13.95 % )                     | 19 ( 44.19 % )                 | 22 ( 51.16 % )                    | 26 ( 60.47 % )                   |
|                             |                                           |                           | North America (n = 34)     | 6 ( 17.65 % )                     | 14 ( 41.18 % )                 | 25 ( 73.53 % )                    | 25 ( 73.53 % )                   |
|                             |                                           |                           | South America (n =7)       | 1 ( 14.29 % )                     | 4 ( 57.14 % )                  | 6 ( 85.71 % )                     | 6 ( 85.71 % )                    |
|                             |                                           |                           | Oceania (n = 8)            | 3 ( 37.5 % )                      | 3 ( 37.5 % )                   | 6 ( 75 % )                        | 7 ( 87.5 % )                     |
|                             | Patients on higher dose                   | To be maintained          | Asia (n = 44)              | 19 ( 43.18 % )                    | 9 ( 20.45 % )                  | 2 ( 4.55 % )                      | 2 ( 4.55 % )                     |

|                        |                                      |                                                |                        |                |                |                |                |
|------------------------|--------------------------------------|------------------------------------------------|------------------------|----------------|----------------|----------------|----------------|
|                        | oral corticosteroids                 |                                                | Africa (n = 3)         | 1 ( 33.33 % )  | 1 ( 33.33 % )  | 0              | 0              |
|                        |                                      |                                                | Europe (n = 43)        | 28 ( 65.12 % ) | 13 ( 30.23 % ) | 3 ( 6.98 % )   | 1 ( 2.33 % )   |
|                        |                                      |                                                | North America (n = 34) | 17 ( 50 % )    | 9 ( 26.47 % )  | 4 ( 11.76 % )  | 4 ( 11.76 % )  |
|                        |                                      |                                                | South America (n =7)   | 5 ( 71.43 % )  | 0              | 0              | 0              |
|                        |                                      |                                                | Oceania (n = 8)        | 4 ( 50 % )     | 3 ( 37.5 % )   | 0              | 0              |
|                        |                                      | To be decreased                                | Asia (n = 44)          | 27 ( 61.36 % ) | 35 ( 79.55 % ) | 42 ( 95.45 % ) | 41 ( 93.18 % ) |
|                        |                                      |                                                | Africa (n = 3)         | 2 ( 66.67 % )  | 2 ( 66.67 % )  | 3 ( 100 % )    | 3 ( 100 % )    |
|                        |                                      |                                                | Europe (n = 43)        | 22 ( 51.16 % ) | 28 ( 65.12 % ) | 36 ( 83.72 % ) | 36 ( 83.72 % ) |
|                        |                                      |                                                | North America (n = 34) | 15 ( 44.12 % ) | 21 ( 61.76 % ) | 29 ( 85.29 % ) | 31 ( 91.18 % ) |
|                        |                                      |                                                | South America (n =7)   | 2 ( 28.57 % )  | 7 ( 100 % )    | 7 ( 100 % )    | 7 ( 100 % )    |
|                        |                                      |                                                | Oceania (n = 8)        | 4 ( 50 % )     | 5 ( 62.5 % )   | 7 ( 87.5 % )   | 8 ( 100 % )    |
|                        |                                      | To be tapered and stopped                      | Asia (n = 44)          | 21 ( 47.73 % ) | 37 ( 84.09 % ) | 40 ( 90.91 % ) | 40 ( 90.91 % ) |
|                        |                                      |                                                | Africa (n = 3)         | 0              | 2 ( 66.67 % )  | 3 ( 100 % )    | 3 ( 100 % )    |
|                        |                                      |                                                | Europe (n = 43)        | 8 ( 18.6 % )   | 17 ( 39.53 % ) | 26 ( 60.47 % ) | 31 ( 72.09 % ) |
|                        |                                      |                                                | North America (n = 34) | 8 ( 23.53 % )  | 14 ( 41.18 % ) | 24 ( 70.59 % ) | 26 ( 76.47 % ) |
|                        |                                      |                                                | South America (n =7)   | 2 ( 28.57 % )  | 5 ( 71.43 % )  | 7 ( 100 % )    | 7 ( 100 % )    |
|                        |                                      |                                                | Oceania (n = 8)        | 4 ( 50 % )     | 5 ( 62.5 % )   | 8 ( 100 % )    | 8 ( 100 % )    |
|                        |                                      | IV METHYL PREDNISOLONE                         |                        | To be started  | Asia (n = 44)  | 16 ( 36.36 % ) | 3 ( 6.82 % )   |
| Africa (n = 3)         | 1 ( 33.33 % )                        |                                                |                        |                | 1 ( 33.33 % )  | 0              | 0              |
| Europe (n = 43)        | 16 ( 37.21 % )                       |                                                |                        |                | 7 ( 16.28 % )  | 3 ( 6.98 % )   | 2 ( 4.65 % )   |
| North America (n = 34) | 18 ( 52.94 % )                       |                                                |                        |                | 11 ( 32.35 % ) | 3 ( 8.82 % )   | 1 ( 2.94 % )   |
| South America (n =7)   | 2 ( 28.57 % )                        |                                                |                        |                | 0              | 1 ( 14.29 % )  | 1 ( 14.29 % )  |
| Oceania (n = 8)        | 4 ( 50 % )                           |                                                |                        |                | 2 ( 25 % )     | 0              | 0              |
| LOCAL CORTICOSTEROIDS  | Patients not on oral corticosteroids | To be preferred to systemic therapy            | Asia (n = 44)          | 33 ( 75 % )    | 38 ( 86.36 % ) | 37 ( 84.09 % ) | 36 ( 81.82 % ) |
|                        |                                      |                                                | Africa (n = 3)         | 3 ( 100 % )    | 3 ( 100 % )    | 3 ( 100 % )    | 3 ( 100 % )    |
|                        |                                      |                                                | Europe (n = 43)        | 35 ( 81.4 % )  | 40 ( 93.02 % ) | 40 ( 93.02 % ) | 40 ( 93.02 % ) |
|                        |                                      |                                                | North America (n = 34) | 26 ( 76.47 % ) | 28 ( 82.35 % ) | 29 ( 85.29 % ) | 29 ( 85.29 % ) |
|                        |                                      |                                                | South America (n =7)   | 4 ( 57.14 % )  | 6 ( 85.71 % )  | 6 ( 85.71 % )  | 6 ( 85.71 % )  |
|                        |                                      |                                                | Oceania (n = 8)        | 5 ( 62.5 % )   | 6 ( 75 % )     | 8 ( 100 % )    | 7 ( 87.5 % )   |
|                        | Patients on low dose                 | To be preferred to increasing systemic therapy | Asia (n = 44)          | 34 ( 77.27 % ) | 40 ( 90.91 % ) | 39 ( 88.64 % ) | 37 ( 84.09 % ) |

|                         |                      |                        |                        |               |               |               |               |
|-------------------------|----------------------|------------------------|------------------------|---------------|---------------|---------------|---------------|
|                         | oral corticosteroids |                        | Africa (n = 3)         | 3 ( 100 %)    | 3 ( 100 %)    | 3 ( 100 %)    | 3 ( 100 %)    |
|                         |                      |                        | Europe (n = 43)        | 36 ( 83.72 %) | 40 ( 93.02 %) | 40 ( 93.02 %) | 40 ( 93.02 %) |
|                         |                      |                        | North America (n = 34) | 28 ( 82.35 %) | 29 ( 85.29 %) | 30 ( 88.24 %) | 30 ( 88.24 %) |
|                         |                      |                        | South America (n =7)   | 5 ( 71.43 %)  | 7 ( 100 %)    | 6 ( 85.71 %)  | 6 ( 85.71 %)  |
|                         |                      |                        | Oceania (n = 8)        | 7 ( 87.5 %)   | 8 ( 100 %)    | 8 ( 100 %)    | 8 ( 100 %)    |
| <b>CONVENTIONAL IMT</b> | To be started        | Asia (n = 44)          | 24 ( 54.55 %)          | 4 ( 9.09 %)   | 2 ( 4.55 %)   | 2 ( 4.55 %)   |               |
|                         |                      | Africa (n = 3)         | 1 ( 33.33 %)           | 1 ( 33.33 %)  | 0             | 0             |               |
|                         |                      | Europe (n = 43)        | 21 ( 48.84 %)          | 8 ( 18.6 %)   | 1 ( 2.33 %)   | 0             |               |
|                         |                      | North America (n = 34) | 22 ( 64.71 %)          | 12 ( 35.29 %) | 2 ( 5.88 %)   | 0             |               |
|                         |                      | South America (n =7)   | 3 ( 42.86 %)           | 1 ( 14.29 %)  | 0             | 0             |               |
|                         |                      | Oceania (n = 8)        | 7 ( 87.5 %)            | 4 ( 50 %)     | 0             | 0             |               |
|                         | To be maintained     | Asia (n = 44)          | 29 ( 65.91 %)          | 12 ( 27.27 %) | 3 ( 6.82 %)   | 2 ( 4.55 %)   |               |
|                         |                      | Africa (n = 3)         | 2 ( 66.67 %)           | 1 ( 33.33 %)  | 1 ( 33.33 %)  | 1 ( 33.33 %)  |               |
|                         |                      | Europe (n = 43)        | 39 ( 90.7 %)           | 24 ( 55.81 %) | 8 ( 18.6 %)   | 3 ( 6.98 %)   |               |
|                         |                      | North America (n = 34) | 28 ( 82.35 %)          | 17 ( 50 %)    | 8 ( 23.53 %)  | 5 ( 14.71 %)  |               |
|                         |                      | South America (n =7)   | 6 ( 85.71 %)           | 2 ( 28.57 %)  | 0             | 0             |               |
|                         |                      | Oceania (n = 8)        | 7 ( 87.5 %)            | 4 ( 50 %)     | 1 ( 12.5 %)   | 1 ( 12.5 %)   |               |
|                         | To be decreased      | Asia (n = 44)          | 23 ( 52.27 %)          | 35 ( 79.55 %) | 41 ( 93.18 %) | 41 ( 93.18 %) |               |
|                         |                      | Africa (n = 3)         | 1 ( 33.33 %)           | 2 ( 66.67 %)  | 2 ( 66.67 %)  | 3 ( 100 %)    |               |
|                         |                      | Europe (n = 43)        | 7 ( 16.28 %)           | 21 ( 48.84 %) | 32 ( 74.42 %) | 36 ( 83.72 %) |               |
|                         |                      | North America (n = 34) | 7 ( 20.59 %)           | 16 ( 47.06 %) | 28 ( 82.35 %) | 31 ( 91.18 %) |               |
|                         |                      | South America (n =7)   | 1 ( 14.29 %)           | 6 ( 85.71 %)  | 7 ( 100 %)    | 7 ( 100 %)    |               |
|                         |                      | Oceania (n = 8)        | 2 ( 25 %)              | 4 ( 50 %)     | 8 ( 100 %)    | 8 ( 100 %)    |               |
|                         | To be stopped        | Asia (n = 44)          | 13 ( 29.55 %)          | 26 ( 59.09 %) | 40 ( 90.91 %) | 41 ( 93.18 %) |               |
|                         |                      | Africa (n = 3)         | 0                      | 2 ( 66.67 %)  | 2 ( 66.67 %)  | 3 ( 100 %)    |               |
|                         |                      | Europe (n = 43)        | 6 ( 13.95 %)           | 13 ( 30.23 %) | 33 ( 76.74 %) | 36 ( 83.72 %) |               |
|                         |                      | North America (n = 34) | 4 ( 11.76 %)           | 14 ( 41.18 %) | 26 ( 76.47 %) | 30 ( 88.24 %) |               |
|                         |                      | South America (n =7)   | 1 ( 14.29 %)           | 2 ( 28.57 %)  | 7 ( 100 %)    | 7 ( 100 %)    |               |
|                         |                      | Oceania (n = 8)        | 1 ( 12.5 %)            | 2 ( 25 %)     | 8 ( 100 %)    | 8 ( 100 %)    |               |
| <b>BIOLOGICS</b>        | To be started        | Asia (n = 44)          | 17 ( 38.64 %)          | 4 ( 9.09 %)   | 4 ( 9.09 %)   | 3 ( 6.82 %)   |               |

|                        |                 |                        |                |                |                |                |
|------------------------|-----------------|------------------------|----------------|----------------|----------------|----------------|
|                        |                 | Africa (n = 3)         | 1 ( 33.33 % )  | 1 ( 33.33 % )  | 0              | 0              |
|                        |                 | Europe (n = 43)        | 19 ( 44.19 % ) | 9 ( 20.93 % )  | 3 ( 6.98 % )   | 3 ( 6.98 % )   |
|                        |                 | North America (n = 34) | 21 ( 61.76 % ) | 11 ( 32.35 % ) | 4 ( 11.76 % )  | 2 ( 5.88 % )   |
|                        |                 | South America (n =7)   | 2 ( 28.57 % )  | 0              | 0              | 0              |
|                        |                 | Oceania (n = 8)        | 4 ( 50 % )     | 1 ( 12.5 % )   | 0              | 0              |
|                        | To be continued | Asia (n = 44)          | 27 ( 61.36 % ) | 12 ( 27.27 % ) | 3 ( 6.82 % )   | 2 ( 4.55 % )   |
|                        |                 | Africa (n = 3)         | 1 ( 33.33 % )  | 1 ( 33.33 % )  | 0              | 0              |
|                        |                 | Europe (n = 43)        | 40 ( 93.02 % ) | 26 ( 60.47 % ) | 8 ( 18.6 % )   | 4 ( 9.3 % )    |
|                        |                 | North America (n = 34) | 28 ( 82.35 % ) | 14 ( 41.18 % ) | 6 ( 17.65 % )  | 5 ( 14.71 % )  |
|                        |                 | South America (n =7)   | 6 ( 85.71 % )  | 2 ( 28.57 % )  | 0              | 0              |
|                        |                 | Oceania (n = 8)        | 7 ( 87.5 % )   | 5 ( 62.5 % )   | 0              | 0              |
|                        | To be stopped   | Asia (n = 44)          | 15 ( 34.09 % ) | 29 ( 65.91 % ) | 38 ( 86.36 % ) | 39 ( 88.64 % ) |
|                        |                 | Africa (n = 3)         | 2 ( 66.67 % )  | 2 ( 66.67 % )  | 3 ( 100 % )    | 3 ( 100 % )    |
|                        |                 | Europe (n = 43)        | 6 ( 13.95 % )  | 18 ( 41.86 % ) | 35 ( 81.4 % )  | 38 ( 88.37 % ) |
|                        |                 | North America (n = 34) | 5 ( 14.71 % )  | 18 ( 52.94 % ) | 27 ( 79.41 % ) | 29 ( 85.29 % ) |
|                        |                 | South America (n =7)   | 1 ( 14.29 % )  | 5 ( 71.43 % )  | 7 ( 100 % )    | 7 ( 100 % )    |
|                        |                 | Oceania (n = 8)        | 1 ( 12.5 % )   | 2 ( 25 % )     | 8 ( 100 % )    | 8 ( 100 % )    |
|                        | TOCILIZUMAB     | To be started          | Asia (n = 44)  | 22 ( 50 % )    | 14 ( 31.82 % ) | 12 ( 27.27 % ) |
| Africa (n = 3)         |                 |                        | 1 ( 33.33 % )  | 1 ( 33.33 % )  | 1 ( 33.33 % )  | 1 ( 33.33 % )  |
| Europe (n = 43)        |                 |                        | 21 ( 48.84 % ) | 16 ( 37.21 % ) | 14 ( 32.56 % ) | 16 ( 37.21 % ) |
| North America (n = 34) |                 |                        | 21 ( 61.76 % ) | 12 ( 35.29 % ) | 10 ( 29.41 % ) | 10 ( 29.41 % ) |
| South America (n =7)   |                 |                        | 3 ( 42.86 % )  | 0              | 2 ( 28.57 % )  | 2 ( 28.57 % )  |
| Oceania (n = 8)        |                 |                        | 4 ( 50 % )     | 3 ( 37.5 % )   | 2 ( 25 % )     | 2 ( 25 % )     |
| To be continued        |                 | Asia (n = 44)          | 31 ( 70.45 % ) | 24 ( 54.55 % ) | 16 ( 36.36 % ) | 16 ( 36.36 % ) |
|                        |                 | Africa (n = 3)         | 1 ( 33.33 % )  | 1 ( 33.33 % )  | 1 ( 33.33 % )  | 1 ( 33.33 % )  |
|                        |                 | Europe (n = 43)        | 41 ( 95.35 % ) | 36 ( 83.72 % ) | 24 ( 55.81 % ) | 25 ( 58.14 % ) |
|                        |                 | North America (n = 34) | 29 ( 85.29 % ) | 21 ( 61.76 % ) | 17 ( 50 % )    | 15 ( 44.12 % ) |
|                        |                 | South America (n =7)   | 6 ( 85.71 % )  | 3 ( 42.86 % )  | 2 ( 28.57 % )  | 2 ( 28.57 % )  |
|                        |                 | Oceania (n = 8)        | 7 ( 87.5 % )   | 5 ( 62.5 % )   | 3 ( 37.5 % )   | 3 ( 37.5 % )   |
| To switch to           | Asia (n = 44)   | 15 ( 34.09 % )         | 15 ( 34.09 % ) | 14 ( 31.82 % ) | 17 ( 38.64 % ) |                |

|  |  |                        |                |                |                |                |
|--|--|------------------------|----------------|----------------|----------------|----------------|
|  |  | Africa (n = 3)         | 0              | 0              | 0              | 0              |
|  |  | Europe (n = 43)        | 12 ( 27.91 % ) | 12 ( 27.91 % ) | 20 ( 46.51 % ) | 21 ( 48.84 % ) |
|  |  | North America (n = 34) | 14 ( 41.18 % ) | 7 ( 20.59 % )  | 9 ( 26.47 % )  | 10 ( 29.41 % ) |
|  |  | South America (n =7)   | 3 ( 42.86 % )  | 1 ( 14.29 % )  | 2 ( 28.57 % )  | 2 ( 28.57 % )  |
|  |  | Oceania (n = 8)        | 3 ( 37.5 % )   | 3 ( 37.5 % )   | 1 ( 12.5 % )   | 2 ( 25 % )     |

|                           |                            |
|---------------------------|----------------------------|
| <b>Consensus for “No”</b> | <b>Consensus for “Yes”</b> |
|---------------------------|----------------------------|

\*Very high risk category: patients with uveitis or rheumatologic disease with two or more risk factors
