# Supplementary material
Source: PubMed Central journal article supplement (PMC7313529)
Supplement: bjophthalmol-2020-316776s006.pdf [file bjophthalmol-2020-316776s006.pdf]

| <b>Table 4: Consensus guidelines on the Use of Non-steroidal anti-inflammatory drugs (NSAIDs) (n= 139)</b> |                 |                              |                                   |                                  |
|------------------------------------------------------------------------------------------------------------|-----------------|------------------------------|-----------------------------------|----------------------------------|
|                                                                                                            | Healthy patient | Healthy patient with contact | Sick patient - COVID-19 suspected | Sick patient - COVID-19 positive |
| To be started                                                                                              | 108 (77.7%)     | 79 (56.8%)                   | 44 (31.7%)                        | 36 (25.9%)                       |
| To be maintained                                                                                           | 122 (87.8%)     | 85 (61.2%)                   | 49 (35.3%)                        | 36 (25.9%)                       |
| To be decreased                                                                                            | 32 (23%)        | 61 (43.9%)                   | 90 (64.7%)                        | 99 (71.2%)                       |
| To be stopped                                                                                              | 22 (15.8%)      | 55 (39.6%)                   | 93 (66.9%)                        | 103 (74.1%)                      |

|                           |                            |
|---------------------------|----------------------------|
| <b>Consensus for “No”</b> | <b>Consensus for “Yes”</b> |
|---------------------------|----------------------------|

**Table 4A: Consensus guidelines on the Use of Non-steroidal anti-inflammatory drugs (NSAIDs) in patients – As per years of experience and uveitis patients per year**

|                  | Uveitis specialists' expertise |                | Healthy patient – without contact | Healthy patient - with contact | Sick patient - COVID-19 suspected | Sick patient - COVID-19 positive |
|------------------|--------------------------------|----------------|-----------------------------------|--------------------------------|-----------------------------------|----------------------------------|
| To be started    | Years of experience in uveitis | ≤ 15 (n = 80)  | 66 ( 82.50 % )                    | 51 ( 63.75 % )                 | 29 ( 36.25 % )                    | 24 ( 30.00 % )                   |
|                  |                                | > 15 (n = 59)  | 42 ( 71.19 % )                    | 28 ( 47.46 % )                 | 15 ( 25.42 % )                    | 12 ( 20.34 % )                   |
|                  | Uveitis patients on IMT/year   | < 300 (n = 85) | 66 ( 77.65 % )                    | 48 ( 56.47 % )                 | 30 ( 35.29 % )                    | 23 ( 27.06 % )                   |
|                  |                                | ≥ 300 (n =54)  | 42 ( 77.78 % )                    | 31 ( 57.41 % )                 | 14 ( 25.93 % )                    | 13 ( 24.07 % )                   |
| To be maintained | Years of experience in uveitis | ≤ 15 (n = 80)  | 72 ( 90.00 % )                    | 55 ( 68.75 % )                 | 33 ( 41.25 % )                    | 24 ( 30.00 % )                   |
|                  |                                | > 15 (n = 59)  | 50 ( 84.75 % )                    | 30 ( 50.85 % )                 | 16 ( 27.12 % )                    | 12 ( 20.34 % )                   |
|                  | Uveitis patients on IMT/year   | < 300 (n = 85) | 74 ( 87.06 % )                    | 52 ( 61.18 % )                 | 31 ( 36.47 % )                    | 22 ( 25.88 % )                   |
|                  |                                | ≥ 300 (n =54)  | 48 ( 88.89 % )                    | 33 ( 61.11 % )                 | 18 ( 33.33 % )                    | 14 ( 25.93 % )                   |
| To be decreased  | Years of experience in uveitis | ≤ 15 (n = 80)  | 15 ( 18.75 % )                    | 30 ( 37.50 % )                 | 50 ( 62.50 % )                    | 55 ( 68.75 % )                   |
|                  |                                | > 15 (n = 59)  | 17 ( 28.81 % )                    | 31 ( 52.54 % )                 | 40 ( 67.80 % )                    | 44 ( 74.58 % )                   |
|                  | Uveitis patients on IMT/year   | < 300 (n = 85) | 18 ( 21.18 % )                    | 35 ( 41.18 % )                 | 49 ( 57.65 % )                    | 56 ( 65.88 % )                   |
|                  |                                | ≥ 300 (n =54)  | 14 ( 25.93 % )                    | 26 ( 48.15 % )                 | 41 ( 75.93 % )                    | 43 ( 79.63 % )                   |
| To be stopped    | Years of experience in uveitis | ≤ 15 (n = 80)  | 12 ( 15.00 % )                    | 26 ( 32.50 % )                 | 51 ( 63.75 % )                    | 57 ( 71.25 % )                   |
|                  |                                | > 15 (n = 59)  | 10 ( 16.95 % )                    | 29 ( 49.15 % )                 | 42 ( 71.19 % )                    | 46 ( 77.97 % )                   |
|                  | Uveitis patients on IMT/year   | < 300 (n = 85) | 11 ( 12.94 % )                    | 31 ( 36.47 % )                 | 54 ( 63.53 % )                    | 61 ( 71.76 % )                   |
|                  |                                | ≥ 300 (n =54)  | 11 ( 20.37 % )                    | 24 ( 44.44 % )                 | 39 ( 72.22 % )                    | 42 ( 77.78 % )                   |

Consensus for “No”

Consensus for “Yes”

**Table 4B:** Consensus guidelines on the Use of Non-steroidal anti-inflammatory drugs (NSAIDs) in patients with Scleritis – As per **geographical region**

|                  | Experts' geographical area | Healthy patient – without contact | Healthy patient - with contact | Sick patient - COVID-19 suspected | Sick patient - COVID-19 positive |
|------------------|----------------------------|-----------------------------------|--------------------------------|-----------------------------------|----------------------------------|
| To be started    | Asia (n = 44)              | 36 ( 81.82 % )                    | 24 ( 54.55 % )                 | 10 ( 22.73 % )                    | 8 ( 18.18 % )                    |
|                  | Africa (n = 3)             | 3 ( 100.0 % )                     | 1 ( 33.33 % )                  | 1 ( 33.33 % )                     | 1 ( 33.33 % )                    |
|                  | Europe (n = 43)            | 23 ( 53.49 % )                    | 18 ( 41.86 % )                 | 11 ( 25.58 % )                    | 10 ( 23.26 % )                   |
|                  | North America (n = 34)     | 33 ( 97.06 % )                    | 28 ( 82.35 % )                 | 16 ( 47.06 % )                    | 11 ( 32.35 % )                   |
|                  | South America (n =7)       | 5 ( 71.43 % )                     | 1 ( 14.29 % )                  | 1 ( 14.29 % )                     | 1 ( 14.29 % )                    |
|                  | Oceania (n = 8)            | 8 ( 100 % )                       | 7 ( 87.5% )                    | 5 ( 71.43 % )                     | 5 ( 71.43 % )                    |
| To be maintained | Asia (n = 44)              | 39 ( 88.64 % )                    | 23 ( 52.27 % )                 | 11 ( 25 % )                       | 8 ( 18.18 % )                    |
|                  | Africa (n = 3)             | 3 ( 100.0 % )                     | 1 ( 33.33 % )                  | 1 ( 33.33 % )                     | 1 ( 33.33 % )                    |
|                  | Europe (n = 43)            | 33 ( 76.74 % )                    | 25 ( 58.14 % )                 | 13 ( 30.23 % )                    | 10 ( 23.26 % )                   |
|                  | North America (n = 34)     | 33 ( 97.06 % )                    | 28 ( 82.35 % )                 | 18 ( 52.94 % )                    | 11 ( 32.35 % )                   |
|                  | South America (n =7)       | 6 ( 85.71 % )                     | 1 ( 14.29 % )                  | 1 ( 14.29 % )                     | 1 ( 14.29 % )                    |
|                  | Oceania (n = 8)            | 8 ( 100 % )                       | 7 ( 87.5 % )                   | 5 ( 71.43 % )                     | 5 ( 71.43 % )                    |
| To be decreased  | Asia (n = 44)              | 15 ( 34.09 % )                    | 23 ( 52.27 % )                 | 33 ( 75 % )                       | 35 ( 79.55 % )                   |
|                  | Africa (n = 3)             | 0                                 | 2 ( 66.67 % )                  | 2 ( 66.67 % )                     | 2 ( 66.67 % )                    |
|                  | Europe (n = 43)            | 13 ( 30.23 % )                    | 24 ( 55.81 % )                 | 30 ( 69.77 % )                    | 32 ( 74.42 % )                   |
|                  | North America (n = 34)     | 3 ( 8.82 % )                      | 6 ( 17.65 % )                  | 15 ( 44.12 % )                    | 20 ( 58.82 % )                   |
|                  | South America (n =7)       | 1 ( 14.29 % )                     | 5 ( 71.43 % )                  | 6 ( 85.71 % )                     | 6 ( 85.71 % )                    |
|                  | Oceania (n = 8)            | 0                                 | 1 ( 14.29 % )                  | 4 ( 57.14 % )                     | 4 ( 57.14 % )                    |
| To be stopped    | Asia (n = 44)              | 10 ( 22.73 % )                    | 21 ( 47.73 % )                 | 32 ( 72.73 % )                    | 35 ( 79.55 % )                   |
|                  | Africa (n = 3)             | 0                                 | 1 ( 33.33 % )                  | 3 ( 100 % )                       | 3 ( 100 % )                      |
|                  | Europe (n = 43)            | 11 ( 25.58 % )                    | 20 ( 46.51 % )                 | 32 ( 74.42 % )                    | 34 ( 79.07 % )                   |
|                  | North America (n = 34)     | 0                                 | 7 ( 20.59 % )                  | 16 ( 47.06 % )                    | 21 ( 61.76 % )                   |
|                  | South America (n =7)       | 1 ( 14.29 % )                     | 5 ( 71.43 % )                  | 6 ( 85.71 % )                     | 6 ( 85.71 % )                    |
|                  | Oceania (n = 8)            | 0                                 | 1 ( 14.29 % )                  | 4 ( 57.14 % )                     | 4 ( 57.14 % )                    |
