# Supplementary material
Source: PubMed Central journal article supplement (PMC7313529)
Supplement: bjophthalmol-2020-316776s007.pdf [file bjophthalmol-2020-316776s007.pdf]

| <b>Table 5: Consensus guidelines on the Use of Hydroxychloroquine (n =139)</b> |                 |                              |                                   |                                  |
|--------------------------------------------------------------------------------|-----------------|------------------------------|-----------------------------------|----------------------------------|
|                                                                                | Healthy patient | Healthy patient with contact | Sick patient - COVID-19 suspected | Sick patient - COVID-19 positive |
| To be started                                                                  | 59 (42.4%)      | 65 (46.8%)                   | 80 (57.6%)                        | 91 (65.5%)                       |
| To be continued                                                                | 126 (90.6%)     | 129 (92.8%)                  | 125 (89.9%)                       | 128 (92.1%)                      |

**Consensus for “Yes”**

**Table 5A: Consensus guidelines on the Use of Hydroxychloroquine – As per years of experience and uveitis patients per year**

|                 | Uveitis specialists' expertise |                | Healthy patient – without contact | Healthy patient - with contact | Sick patient - COVID-19 suspected | Sick patient - COVID-19 positive |
|-----------------|--------------------------------|----------------|-----------------------------------|--------------------------------|-----------------------------------|----------------------------------|
| To be started   | Years of experience in uveitis | ≤ 15 (n = 80)  | 36 ( 45.00 % )                    | 39 ( 48.75 % )                 | 50 ( 62.50 % )                    | 54 ( 67.50 % )                   |
|                 |                                | > 15 (n = 59)  | 23 ( 38.98 % )                    | 26 ( 44.07 % )                 | 30 ( 50.85 % )                    | 37 ( 62.71 % )                   |
|                 | Uveitis patients on IMT/year   | < 300 (n = 85) | 38 ( 44.71 % )                    | 42 ( 49.41 % )                 | 49 ( 57.65 % )                    | 55 ( 64.71 % )                   |
|                 |                                | ≥ 300 (n =54)  | 21 ( 38.89 % )                    | 23 ( 42.59 % )                 | 31 ( 57.41 % )                    | 36 ( 66.67 % )                   |
| To be continued | Years of experience in uveitis | ≤ 15 (n = 80)  | 73 ( 91.25 % )                    | 76 ( 95 % )                    | 73 ( 91.25 % )                    | 73 ( 91.25 % )                   |
|                 |                                | > 15 (n = 59)  | 53 ( 89.83 % )                    | 53 ( 89.83 % )                 | 52 ( 88.14 % )                    | 55 ( 93.22 % )                   |
|                 | Uveitis patients on IMT/year   | < 300 (n = 85) | 78 ( 91.76 % )                    | 80 ( 94.12 % )                 | 75 ( 88.24 % )                    | 76 ( 89.41 % )                   |
|                 |                                | ≥ 300 (n =54)  | 48 ( 88.89 % )                    | 49 ( 90.74 % )                 | 50 ( 92.59 % )                    | 52 ( 96.30 % )                   |

**Table 5B: Consensus guidelines on the Use of Hydroxychloroquine – As per geographical region**

|                 | Experts' geographical area | Healthy patient – without contact | Healthy patient - with contact | Sick patient - COVID-19 suspected | Sick patient - COVID-19 positive |
|-----------------|----------------------------|-----------------------------------|--------------------------------|-----------------------------------|----------------------------------|
| To be started   | Asia (n = 44)              | 21 ( 47.73 % )                    | 26 ( 59.09 % )                 | 31 ( 70.45 % )                    | 33 ( 75 % )                      |
|                 | Africa (n = 3)             | 1 ( 33.33 % )                     | 3 ( 100 % )                    | 2 ( 66.67 % )                     | 2 ( 66.67 % )                    |
|                 | Europe (n = 43)            | 19 ( 44.19 % )                    | 19 ( 44.19 % )                 | 26 ( 60.47 % )                    | 28 ( 65.12 % )                   |
|                 | North America (n = 34)     | 13 ( 38.24 % )                    | 12 ( 35.29 % )                 | 13 ( 38.24 % )                    | 19 ( 55.88 % )                   |
|                 | South America (n =7)       | 4 ( 57.14 % )                     | 4 ( 57.14 % )                  | 5 ( 71.43 % )                     | 6 ( 85.71 % )                    |
|                 | Oceania (n = 8)            | 1 ( 12.5 % )                      | 1 ( 12.5 % )                   | 3 ( 37.5 % )                      | 3 ( 37.5 % )                     |
| To be continued | Asia (n = 44)              | 38 ( 86.36 % )                    | 40 ( 90.91 % )                 | 38 ( 86.36 % )                    | 40 ( 90.91 % )                   |
|                 | Africa (n = 3)             | 3 ( 100 % )                       | 3 ( 100 % )                    | 3 ( 100 % )                       | 3 ( 100 % )                      |
|                 | Europe (n = 43)            | 41 ( 95.35 % )                    | 41 ( 95.35 % )                 | 40 ( 93.02 % )                    | 40 ( 93.02 % )                   |
|                 | North America (n = 34)     | 32 ( 94.12 % )                    | 32 ( 94.12 % )                 | 31 ( 91.18 % )                    | 32 ( 94.12 % )                   |
|                 | South America (n =7)       | 6 ( 85.71 % )                     | 7 ( 100 % )                    | 7 ( 100 % )                       | 7 ( 100 % )                      |
|                 | Oceania (n = 8)            | 6 ( 75 % )                        | 6 ( 75 % )                     | 6 ( 75 % )                        | 6 ( 75 % )                       |

**Consensus for “Yes”**
