# Supplementary material
Source: PubMed Central journal article supplement (PMC7313529)
Supplement: bjophthalmol-2020-316776s008.pdf [file bjophthalmol-2020-316776s008.pdf]

| <b>Table 6: General recommendations for uveitis/rheumatologically patients on conventional IMT or biologics (n =139)</b> |             |
|--------------------------------------------------------------------------------------------------------------------------|-------------|
| Hand and personal hygiene                                                                                                | 139 (100%)  |
| Avoiding crowds                                                                                                          | 139 (100%)  |
| Use of masks                                                                                                             | 120 (86.3%) |
| Avoiding unproductive attendances at hospital                                                                            | 139 (100%)  |
| Postponing long-term follow-up                                                                                           | 127 (91.4%) |
| Self-isolation                                                                                                           | 107 (77%)   |
| If really sick (with no symptoms of respiratory infection), see urgently doctor                                          | 136 (97.8%) |

**Consensus for “Yes”**

**Table 6A:** General recommendations for uveitis patients on conventional IMT or biologics – As per **years of experience** and **number of patients of uveitis on IMT per year**

| Criteria                                                                        | Uveitis specialists' expertise |                | No. (%)        |
|---------------------------------------------------------------------------------|--------------------------------|----------------|----------------|
| Hand and personal hygiene                                                       | Years of experience in uveitis | ≤ 15 (n = 80)  | 80 ( 100 % )   |
|                                                                                 |                                | > 15 (n = 59)  | 59 ( 100 % )   |
|                                                                                 | Uveitis patients on IMT/year   | < 300 (n = 85) | 85 ( 100 % )   |
|                                                                                 |                                | ≥ 300 (n =54)  | 54 ( 100 % )   |
| Avoiding crowds                                                                 | Years of experience in uveitis | ≤ 15 (n = 80)  | 80 ( 100 % )   |
|                                                                                 |                                | > 15 (n = 59)  | 59 ( 100 % )   |
|                                                                                 | Uveitis patients on IMT/year   | < 300 (n = 85) | 85 ( 100 % )   |
|                                                                                 |                                | ≥ 300 (n =54)  | 54 ( 100 % )   |
| Use of masks                                                                    | Years of experience in uveitis | ≤ 15 (n = 80)  | 72 ( 90 % )    |
|                                                                                 |                                | > 15 (n = 59)  | 48 ( 81.36 % ) |
|                                                                                 | Uveitis patients on IMT/year   | < 300 (n = 85) | 74 ( 87.06 % ) |
|                                                                                 |                                | ≥ 300 (n =54)  | 46 ( 85.19 % ) |
| Avoiding unproductive attendances at hospital                                   | Years of experience in uveitis | ≤ 15 (n = 80)  | 80 ( 100 % )   |
|                                                                                 |                                | > 15 (n = 59)  | 59 ( 100 % )   |
|                                                                                 | Uveitis patients on IMT/year   | < 300 (n = 85) | 85 ( 100 % )   |
|                                                                                 |                                | ≥ 300 (n =54)  | 54 ( 100 % )   |
| Postponing long-term follow-up                                                  | Years of experience in uveitis | ≤ 15 (n = 80)  | 76 ( 95 % )    |
|                                                                                 |                                | > 15 (n = 59)  | 51 ( 86.44 % ) |
|                                                                                 | Uveitis patients on IMT/year   | < 300 (n = 85) | 76 ( 89.41 % ) |
|                                                                                 |                                | ≥ 300 (n =54)  | 51 ( 94.44 % ) |
| Self-isolation                                                                  | Years of experience in uveitis | ≤ 15 (n = 80)  | 61 ( 76.25 % ) |
|                                                                                 |                                | > 15 (n = 59)  | 46 ( 77.97 % ) |
|                                                                                 | Uveitis patients on IMT/year   | < 300 (n = 85) | 64 ( 75.29 % ) |
|                                                                                 |                                | ≥ 300 (n =54)  | 43 ( 79.63 % ) |
| If really sick (with no symptoms of respiratory infection), see urgently doctor | Years of experience in uveitis | ≤ 15 (n = 80)  | 78 ( 97.5 % )  |
|                                                                                 |                                | > 15 (n = 59)  | 58 ( 98.31 % ) |
|                                                                                 | Uveitis patients on IMT/year   | < 300 (n = 85) | 82 ( 96.47 % ) |
|                                                                                 |                                | ≥ 300 (n =54)  | 54 ( 100 % )   |

**Table 6B:** General recommendations for uveitis patients on conventional IMT or biologics -  
As per **geographical region of practice**

| Criteria                                                                           | Experts' geographical area | No. (%)        |
|------------------------------------------------------------------------------------|----------------------------|----------------|
| Hand and personal hygiene                                                          | Asia (n = 44)              | 44 ( 100 % )   |
|                                                                                    | Africa (n = 3)             | 3 ( 100 % )    |
|                                                                                    | Europe (n = 43)            | 43 ( 100 % )   |
|                                                                                    | North America (n = 34)     | 34 ( 100 % )   |
|                                                                                    | South America (n =7)       | 7 ( 100 % )    |
|                                                                                    | Oceania (n = 8)            | 8 ( 100 % )    |
| Avoiding crowds                                                                    | Asia (n = 44)              | 44 ( 100 % )   |
|                                                                                    | Africa (n = 3)             | 3 ( 100 % )    |
|                                                                                    | Europe (n = 43)            | 43 ( 100 % )   |
|                                                                                    | North America (n = 34)     | 34 ( 100 % )   |
|                                                                                    | South America (n =7)       | 7 ( 100 % )    |
|                                                                                    | Oceania (n = 8)            | 8 ( 100 % )    |
| Use of masks                                                                       | Asia (n = 44)              | 43 ( 97.73 % ) |
|                                                                                    | Africa (n = 3)             | 3 ( 100 % )    |
|                                                                                    | Europe (n = 43)            | 35 ( 81.4 % )  |
|                                                                                    | North America (n = 34)     | 28 ( 82.35 % ) |
|                                                                                    | South America (n =7)       | 7 ( 100 % )    |
|                                                                                    | Oceania (n = 8)            | 4 ( 50 % )     |
| Avoiding unproductive attendances at hospital                                      | Asia (n = 44)              | 44 ( 100 % )   |
|                                                                                    | Africa (n = 3)             | 3 ( 100 % )    |
|                                                                                    | Europe (n = 43)            | 43 ( 100 % )   |
|                                                                                    | North America (n = 34)     | 34 ( 100 % )   |
|                                                                                    | South America (n =7)       | 7 ( 100 % )    |
|                                                                                    | Oceania (n = 8)            | 8 ( 100 % )    |
| Postponing long-term follow-up                                                     | Asia (n = 44)              | 38 ( 86.36 % ) |
|                                                                                    | Africa (n = 3)             | 3 ( 100 % )    |
|                                                                                    | Europe (n = 43)            | 42 ( 97.67 % ) |
|                                                                                    | North America (n = 34)     | 30 ( 88.24 % ) |
|                                                                                    | South America (n =7)       | 7 ( 100 % )    |
|                                                                                    | Oceania (n = 8)            | 7 ( 87.5 % )   |
| Self-isolation                                                                     | Asia (n = 44)              | 34 ( 77.27 % ) |
|                                                                                    | Africa (n = 3)             | 1 ( 33.33 % )  |
|                                                                                    | Europe (n = 43)            | 35 ( 81.4 % )  |
|                                                                                    | North America (n = 34)     | 24 ( 70.59 % ) |
|                                                                                    | South America (n =7)       | 7 ( 100 % )    |
|                                                                                    | Oceania (n = 8)            | 6 ( 75 % )     |
| If really sick (with no symptoms of respiratory infection),<br>see urgently doctor | Asia (n = 44)              | 43 ( 97.73 % ) |
|                                                                                    | Africa (n = 3)             | 3 ( 100 % )    |
|                                                                                    | Europe (n = 43)            | 43 ( 100 % )   |
|                                                                                    | North America (n = 34)     | 33 ( 97.06 % ) |
|                                                                                    | South America (n =7)       | 6 ( 85.71 % )  |
|                                                                                    | Oceania (n = 8)            | 8 ( 100 % )    |

**Consensus for “Yes”**
